# Supplementary material for: Investigating the effect of El Niño on nitrous oxide distribution in the eastern tropical South Pacific
Source: Copernicus journal article supplement (doi:10.5194/bg-16-2079-2019), 2019-05-17
Supplement: Supplementary file 1 [file DataSubmission_20190424-bg2018-453.xls]

## Sheet: OceanNinoIndex
	Year →	1985	2009	2011	2012	2013	2015
Season ↓	Month ↓
Summer	1	-0.9	-0.8	-1.3	-0.7	-0.4	0.5
	2	-0.7	-0.7	-1.1	-0.5	-0.4	0.4
	3	-0.7	-0.4	-0.8	-0.4	-0.3	0.5
Fall	4	-0.7	-0.1	-0.6	-0.4	-0.2	0.7
	5	-0.7	0.2	-0.3	-0.3	-0.2	0.9
	6	-0.6	0.4	-0.2	-0.1	-0.2	1
Winter	7	-0.4	0.5	-0.3	0.1	-0.3	1.2
	8	-0.4	0.6	-0.5	0.3	-0.3	1.5
	9	-0.4	0.7	-0.7	0.3	-0.2	1.8
Spring	10	-0.3	1	-0.9	0.3	-0.3	2.1
	11	-0.2	1.2	-0.9	0.1	-0.3	2.2
	12	-0.3	1.3	-0.8	-0.2	-0.3	2.3
		Weak La Nina	Neutral	Moderate La nina	Neutral	Neutral	Very strong El Nino

## Sheet: StationA
Cruise	Year	Month	Latitude[degN]	Longitude[degE]	Station	Depth[m]	Temperature[degC]	Salinity[PSU]	InSituDensity[kg/m3]	O2[µmol/kg]	N2O[nmol/L]	SD_N2O [nmol/L]	PotDensity,σθ[kg/m3]	N2Oatm[ppm]	N2OSat[nmol/L]	DeltaN2O[nmol/L]
M90 discrete	2012	11	0.0005	-85.8335	13_6	991.4	5.0289	34.5645	1031.91	61.81	31.0318	1.1064	27.3363	0.32565	12.7344	18.2974
M90 discrete	2012	11	0.0005	-85.8335	13_8	793.2	6.0447	34.5702	1030.85	50.21	31.1618	1.47049	27.2165	0.32565	12.2556	18.9063
M90 discrete	2012	11	0.0005	-85.8335	13_9	693.4	6.4348	34.5818	1030.34	38.34	38.7981	0.909977	27.1743	0.32565	12.0776	26.7205
M90 discrete	2012	11	0.0005	-85.8335	13_11	596.3	7.2704	34.6018	1029.78	32.75	44.7163	2.71792	27.0756	0.32565	11.7087	33.0076
M90 discrete	2012	11	0.0005	-85.8335	13_13	499	7.9725	34.6311	1029.25	20.95	51.3073	2.76826	26.996	0.32565	11.4098	39.8975
M90 discrete	2012	11	0.0005	-85.8335	13_14	448.8	8.4538	34.6528	1028.96	15.22	51.6086	3.23027	26.9397	0.32565	11.2109	40.3977
M90 discrete	2012	11	0.0005	-85.8335	13_16	356.9	10.3635	34.7553	1028.29	7.96	64.1925	1.27979	26.7059	0.32565	10.4662	53.7262
M90 discrete	2012	11	0.0005	-85.8335	13_19	300	11.8904	34.8387	1027.8	18.62	56.7422	2.95787	26.4926	0.32565	9.91918	46.823
M90 discrete	2012	11	0.0005	-85.8335	13_21	246.3	13.0027	34.9139	1027.4	51.07	42.5859	0.888078	26.3331	0.32565	9.54453	33.0414
M90 discrete	2012	11	0	-85.8333	14_1	200.2	13.9728	34.9629	1027.02	75.67	36.9201	0.687097	26.1709	0.32565	9.23441	27.6857
M90 discrete	2012	11	0	-85.8333	14_4	173.2	14.1887	34.9726	1026.86	81.03	35.8762	0.878914	26.1321	0.32565	9.16735	26.7089
M90 discrete	2012	11	0	-85.8333	14_5	150.9	14.5464	34.9839	1026.69	90.21	31.0726	0.900799	26.0638	0.32565	9.05795	22.0147
M90 discrete	2012	11	0	-85.8333	14_8	100.1	15.055	35.0277	1026.38	88.42	29.6701	0.666199	25.9854	0.32565	8.90417	20.7659
M90 discrete	2012	11	0	-85.8333	14_11	78.9	15.0007	34.9912	1026.27	75.05	34.958	0.653335	25.9684	0.32565	8.92194	26.036
M90 discrete	2012	11	0	-85.8333	14_12	60.4	15.4125	35.0418	1026.14	88.6	29.5753	0.866982	25.9156	0.32565	8.79902	20.7763
M90 discrete	2012	11	0	-85.8333	14_14	41.9	15.7927	35.0324	1025.96	96.12	28.3906	0.523447	25.8222	0.32565	8.69019	19.7004
M90 discrete	2012	11	0	-85.8333	14_16	23.6	18.9083	34.9516	1025.07	196.23	16.5555	0.542995	25.0098	0.32565	7.86498	8.69053
M90 discrete	2012	11	0	-85.8333	14_18	11.3	22.7349	33.8725	1023.16	216.03	9.30481	0.148604	23.1566	0.32565	7.02777	2.27704
M90 discrete	2012	11	0	-85.8333	14_20	5.8	22.9881	33.8427	1023.04	217.41	8.51227	0.282848	23.0615	0.32565	6.97535	1.53692
SO243	2015	10	0	-85.5	2	1001.1	4.491	34.572	1032.03	66.3934	45.6912	4.3817	27.402	0.328242	13.1011	32.5901
SO243	2015	10	0	-85.5	2	750.3	5.854	34.569	1030.68	50.491	55.7833	3.2086	27.2389	0.328242	12.4418	43.3415
SO243	2015	10	0	-85.5	2	650.5	6.826	34.596	1030.1	34.2784	66.8695	2.3888	27.133	0.328242	11.9974	54.8721
SO243	2015	10	0	-85.5	2	600.2	7.338	34.612	1029.8	24.0921	74.8144	1.8927	27.0742	0.328242	11.7719	63.0425
SO243	2015	10	0	-85.5	2	550.1	7.675	34.62	1029.52	22.2725	79.9631	1.5833	27.0316	0.328242	11.6269	68.3362
SO243	2015	10	0	-85.5	2	499.4	8.2684	34.6452	1029.21	14.4382	85.3992	1.8106	26.9628	0.328242	11.3767	74.0225
SO243	2015	10	0	-85.5	2	450.8	8.948	34.679	1028.9	8.99987	89.024	0.8306	26.8832	0.328242	11.099	77.925
SO243	2015	10	0	-85.5	2	400	9.718	34.721	1028.57	4.29722	94.8066	1.4017	26.7898	0.328242	10.7953	84.0113
SO243	2015	10	0	-85.5	2	374.8	9.97	34.733	1028.42	4.66735	98.1277	1.0044	26.7563	0.328242	10.6985	87.4292
SO243	2015	10	0	-85.5	2	350.6	10.251	34.746	1028.27	4.30821	73.7406	6.9061	26.718	0.328242	10.592	63.1486
SO243	2015	10	0	-85.5	2	324.8	11.198	34.81	1028.03	4.38704	70.2448	3.3834	26.5994	0.328242	10.2426	60.0022
SO243	2015	10	0	-85.5	2	300.3	11.72	34.828	1027.83	8.72713	77.8029	1.8083	26.5164	0.328242	10.0578	67.7451
SO243	2015	10	0	-85.5	2	275.5	12.617	34.889	1027.59	16.057	73.9464	3.8461	26.391	0.328242	9.74913	64.1973
SO243	2015	10	0	-85.5	2	251	12.957	34.91	1027.42	22.6684	67.3333	3.064	26.3393	0.328242	9.63568	57.6976
SO243	2015	10	0	-85.5	2	199.7	14.334	34.976	1026.95	54.8906	40.834	1.6596	26.1047	0.328242	9.19537	31.6386
SO243	2015	10	0	-85.5	2	151.3	15.361	35.027	1026.55	84.6235	32.0436	0.0587	25.9189	0.328242	8.88483	23.1588
SO243	2015	10	0	-85.5	2	126.6	15.668	35.04	1026.38	92.734	27.4631	2.6252	25.8592	0.328242	8.79493	18.6682
SO243	2015	10	0	-85.5	2	100.4	17.568	35.094	1025.85	104.401	20.545	0.3412	25.455	0.328242	8.26669	12.2783
SO243	2015	10	0	-85.5	2	49.3	19.988	35.05	1024.98	131.535	26.1848	0.692	24.8068	0.328242	7.65981	18.525
SO243	2015	10	0	-85.5	2	40	24.136	34.468	1023.33	194.747	15.6955	0.6658	23.2027	0.328242	6.77183	8.92367
SO243	2015	10	0	-85.5	2	20.6	24.563	34.469	1023.12	203.76	14.254	0.0886	23.0749	0.328242	6.68656	7.56744
SO243	2015	10	0	-85.5	2	6.1	24.627	34.468	1023.03	203.601	13.1385	0.1987	23.054	0.328242	6.67395	6.46455

## Sheet: StationB
Cruise	Year	Month	Latitude[degN]	Longitude[degE]	Station	Depth[m]	Temperature[degC]	Salinity[PSU]	InSituDensity[kg/m3]	O2[µmol/kg]	N2O[nmol/L]	SD_N2O [nmol/L]	PotDensity,σθ[kg/m3]	N2Oatm[ppm]	N2OSat[nmol/L]	DeltaN2O[nmol/L]
SO243	2015	10	-2.5	-85.5		800.8	5.696	34.568	1030.94	52.31	45.8172	2.7527	27.2581	0.328242	12.516	33.3012
SO243	2015	10	-2.5	-85.5		601.3	7.511	34.61	1029.79	21.78	60.8538	7.5534	27.0481	0.328242	11.6976	49.1562
SO243	2015	10	-2.5	-85.5		501.5	8.598	34.658	1029.2	18.57	65.021	2.232	26.9225	0.328242	11.2411	53.7799
SO243	2015	10	-2.5	-85.5		382.7	10.428	34.766	1028.43	1.28	76.0281	4.2884	26.7036	0.328242	10.525	65.5031
SO243	2015	10	-2.5	-85.5		301.3	12.268	34.884	1027.8	2.37	87.5074	6.228	26.4557	0.328242	9.86661	77.6408
SO243	2015	10	-2.5	-85.5		201.8	14.575	35.011	1026.97	50.03	49.2158	0.9555	26.0803	0.328242	9.12004	40.0958
SO243	2015	10	-2.5	-85.5		100.4	15.969	35.056	1026.24	84.41	31.9499	1.1483	25.8023	0.328242	8.70784	23.2421
SO243	2015	10	-2.5	-85.5		47	21.281	35.184	1024.76	147.54	24.3121	0.5028	24.5611	0.328242	7.35459	16.9575
SO243	2015	10	-2.5	-85.5		25	23.921	34.726	1023.57	209.77	13.5839	0.4867	23.4606	0.328242	6.80638	6.77752
SO243	2015	10	-2.5	-85.5		19.8	23.934	34.722	1023.54	210.36	13.7785	1.3052	23.4534	0.328242	6.80388	6.97462
SO243	2015	10	-2.5	-85.5		6.4	24.114	34.711	1023.42	210.94	12.7813	0.481	23.3909	0.328242	6.76791	6.01339
M90 discrete	2012	11	-2.00033	-85.8332	23	792.6	5.8287	34.5684	1030.88	51.5482	20.0029	4.6775	27.2421	0.32565	12.3553	7.64762
M90 discrete	2012	11	-2.00033	-85.8332	23	693.2	6.0216	34.5703	1030.39	51.0157	27.4235	4.12398	27.2183	0.32565	12.2662	15.1573
M90 discrete	2012	11	-2.00033	-85.8332	23	596.8	6.63	34.5765	1029.86	38.2976	28.8462	7.76336	27.1432	0.32565	11.9907	16.8555
M90 discrete	2012	11	-2.00033	-85.8332	23	498	8.2032	34.6383	1029.21	12.2163	51.1628	4.03156	26.9672	0.32565	11.3141	39.8488
M90 discrete	2012	11	-2.00033	-85.8332	23	396.9	9.5107	34.7089	1028.58	9.20576	45.8328	1.23407	26.8147	0.32565	10.7901	35.0427
M90 discrete	2012	11	-2.00033	-85.8332	23	299.6	11.6846	34.8466	1027.85	4.31104	52.3534	3.06001	26.5374	0.32565	9.98952	42.3639
M90 discrete	2012	11	-2.00033	-85.8332	23	249.1	12.5444	34.904	1027.49	4.02432	56.2547	1.55698	26.4162	0.32565	9.69537	46.5593
M90 discrete	2012	11	-2.00033	-85.8332	23	197.1	13.217	34.9378	1027.15	32.6042	47.442	2.87777	26.3071	0.32565	9.47412	37.9679
M90 discrete	2012	11	-2.00033	-85.8332	24	148.9	13.6762	34.9595	1026.85	65.2902	26.9136	4.03408	26.2285	0.32565	9.32714	17.5865
M90 discrete	2012	11	-2.00033	-85.8332	24	101.5	14.7577	35.0379	1026.46	91.1258	18.0919	1.06692	26.0583	0.32565	8.99189	9.09997
M90 discrete	2012	11	-2.00033	-85.8332	24	77.9	15.6095	35.068	1026.19	96.727	16.6286	0.791439	25.8923	0.32565	8.74094	7.88764
M90 discrete	2012	11	-2.00033	-85.8332	24	61.9	15.7009	35.0595	1026.09	94.5254	16.1349	2.76397	25.8645	0.32565	8.71514	7.41977
M90 discrete	2012	11	-2.00033	-85.8332	24	42.2	16.0302	35.0729	1025.94	90.2963	15.4592	0.568282	25.7992	0.32565	8.62102	6.83819
M90 discrete	2012	11	-2.00033	-85.8332	24	7.5	21.3917	34.8061	1024.23	228.332	1.66662	0.730369	24.2411	0.32565	7.28597	-5.61935

## Sheet: StationC
Cruise	Year	Month	Latitude[degN]	Longitude[degE]	Station	Depth[m]	Temperature[degC]	Salinity[PSU]	InSituDensity[kg/m3]	O2[µmol/kg]	N2O[nmol/L]	SD_N2O [nmol/L]	PotDensity,σθ[kg/m3]	N2Oatm[ppm]	N2OSat[nmol/L]	DeltaN2O[nmol/L]
ME910/1736-1	2012	12	-9.93018	-80.2302		799.3	5.7707	34.5523	1030.9	20.64	40.5383	0.647011	27.2365	0.325723	12.3862	28.1521
ME910/1736-1	2012	12	-9.93018	-80.2302		700.9	6.4897	34.5705	1030.36	9.19	54.0569	1.85291	27.1583	0.325723	12.0565	42.0004
ME910/1736-1	2012	12	-9.93018	-80.2302		600.8	7.1594	34.5877	1029.81	4.21	59.5369	0.657288	27.0801	0.325723	11.7602	47.7767
ME910/1736-1	2012	12	-9.93018	-80.2302		500.3	8.218	34.6357	1029.22	3.37	75.5808	0.415246	26.963	0.325723	11.3107	64.2701
ME910/1736-1	2012	12	-9.93018	-80.2302		400.9	9.9492	34.7291	1028.54	3.12	73.2093	1.40507	26.7573	0.325723	10.6245	62.5849
ME910/1736-1	2012	12	-9.93018	-80.2302		301.9	11.7923	34.8562	1027.84	3.29	12.4732	0.313322	26.5247	0.325723	9.9541	2.51906
ME910/1736-1	2012	12	-9.93018	-80.2302		252.1	12.4647	34.9008	1027.52	3.22	22.2141	1.54129	26.4293	0.325723	9.72419	12.4899
ME910/1736-3	2012	12	-9.95468	-80.2462		200.3	12.9944	34.9325	1027.2	4.53	56.4631	0.343141	26.3479	0.325723	9.5484	46.9147
ME910/1736-3	2012	12	-9.9547	-80.2462		175.5	13.1297	34.9408	1027.07	4.15	57.8501	0.182925	26.3264	0.325723	9.50419	48.3459
ME910/1736-3	2012	12	-9.95472	-80.2462		153.6	13.4528	34.9574	1026.92	5.74	64.9929	0.868739	26.273	0.325723	9.39992	55.5929
ME910/1736-3	2012	12	-9.95471	-80.2462		102.8	14.0592	34.9875	1026.58	4.61	51.7174	0.803181	26.1688	0.325723	9.20852	42.5088
ME910/1736-3	2012	12	-9.95472	-80.2462		74.7	14.58	35.0078	1026.36	4.06	76.4508	0.882431	26.0726	0.325723	9.04868	67.4021
ME910/1736-3	2012	12	-9.9547	-80.2462		52.9	15.5375	35.0451	1026.08	5.74	67.0672	1.70988	25.8899	0.325723	8.76469	58.3025
ME910/1736-3	2012	12	-9.9547	-80.2462		38.6	16.132	35.0653	1025.89	22.06	52.1951	1.22208	25.7699	0.325723	8.59467	43.6005
ME910/1736-3	2012	12	-9.9547	-80.2462		25.2	17.9711	35.1065	1025.43	139.25	41.5034	0.212418	25.3629	0.325723	8.09761	33.4058
ME910/1736-3	2012	12	-9.95471	-80.2462		18.2	18.1537	35.107	1025.35	153.99	38.4504	0.612485	25.3179	0.325723	8.0506	30.3998
ME910/1736-3	2012	12	-9.9547	-80.2462		13.7	19.8558	35.1403	1024.92	244.55	29.8574	0.656799	24.9087	0.325723	7.62882	22.2286
ME910/1736-3	2012	12	-9.9547	-80.2462		8.9	19.9768	35.1436	1024.87	249.21	26.1267	0.442695	24.8791	0.325723	7.59997	18.5267
SO243	2015	10	-9.513	-80.307	6	800.9	5.328	34.547	1030.98	30.4079	46.6375	1.4184	27.2857	0.328242	12.6924	33.9451
SO243	2015	10	-9.513	-80.307	6	700.9	6.059	34.559	1030.43	14.5959	53.4423	1.6545	27.2048	0.328242	12.3473	41.095
SO243	2015	10	-9.513	-80.307	6	599.5	7.032	34.59	1029.85	6.10772	62.2351	0.2855	27.0995	0.328242	11.9068	50.3283
SO243	2015	10	-9.513	-80.307	6	500.7	8.128	34.623	1029.25	1.27277	69.2561	0.6331	26.9665	0.328242	11.4363	57.8198
SO243	2015	10	-9.513	-80.307	6	400.6	10.221	34.744	1028.53	0.0972261	32.1737	0.1913	26.7226	0.328242	10.6034	21.5703
SO243	2015	10	-9.5132	-80.3073	6	309.7	11.9585	34.8637	1027.89	0.097287	46.3308	0.9668	26.4994	0.328242	9.97332	36.3575
SO243	2015	10	-9.513	-80.307	6	248.9	13.074	34.933	1027.44	0.778632	65.7891	0.9579	26.3336	0.328242	9.59624	56.1929
SO243	2015	10	-9.513	-80.307	6	179.6	13.991	34.985	1026.98	25.1709	62.0223	2.0032	26.1836	0.328242	9.30112	52.7212
SO243	2015	10	-9.513	-80.307	6	149.8	14.43	35.015	1026.78	37.6518	54.438	1.4746	26.1128	0.328242	9.16402	45.274
SO243	2015	10	-9.513	-80.307	6	120.2	14.938	35.04	1026.55	56.4511	45.8858	0.837	26.0212	0.328242	9.00931	36.8765
SO243	2015	10	-9.513	-80.307	6	101.6	15.424	35.046	1026.37	53.2266	42.3724	0.2317	25.9177	0.328242	8.8655	33.5069
SO243	2015	10	-9.513	-80.307	6	92.1	15.632	35.056	1026.28	55.2576	40.9191	1.0758	25.8784	0.328242	8.80458	32.1145
SO243	2015	10	-9.5133	-80.3074	6	75.8	16.1244	35.0922	1026.13	61.0159	41.1686	0.2052	25.7937	0.328242	8.66206	32.5065
SO243	2015	10	-9.513	-80.307	6	50.7	17.754	35.143	1025.67	72.47	38.2194	0.3091	25.4452	0.328242	8.21547	30.0039
SO243	2015	10	-9.513	-80.307	6	35.7	20.034	35.149	1025.02	212.239	15.6367	0.6872	24.8695	0.328242	7.64491	7.99179
SO243	2015	10	-9.513	-80.307	6	25.9	20.061	35.149	1024.97	215.713	14.595	0.0322	24.8619	0.328242	7.63849	6.95651
SO243	2015	10	-9.513	-80.307	6	6.1	20.06	35.149	1024.89	216.18	14.5621	0.2123	24.8611	0.328242	7.63873	6.92337

## Sheet: StationD
Cruise	Year	Month	Latitude[degN]	Longitude[degE]	Station	Depth[m]	Temperature[degC]	Salinity[PSU]	InSituDensity[kg/m3]	O2[µmol/kg]	N2O[nmol/L]	SD_N2O [nmol/L]	PotDensity,σθ[kg/m3]	N2Oatm[ppm]	N2OSat[nmol/L]	DeltaN2O[nmol/L]
Callao Time Series Transect	2011	10	-12.0481	-77.2857	2	0	14.96	34.896	1025.85	165.592	111.924	0.779	25.9013	0.324709	8.91273	103.011
Callao Time Series Transect	2011	10	-12.0481	-77.2857	2	10	13.97	34.922	1026.13	127.651	141.798	1.148	26.1341	0.324709	9.21063	132.587
Callao Time Series Transect	2011	10	-12.0481	-77.2857	2	20	13.59	34.931	1026.26	36.6108	159.387	1.107	26.2205	0.324709	9.3287	150.058
Callao Time Series Transect	2011	10	-12.0481	-77.2857	2	30	13.41	34.936	1026.35	21.5045	32.9105	1.1275	26.2617	0.324709	9.38532	23.5252
Callao Time Series Transect	2011	10	-12.0481	-77.2857	2	50	13.22	34.934	1026.48	17.1608	5.8367	0.13325	26.2994	0.324709	9.44598	-3.60928
Callao Time Series Transect	2011	10	-12.0481	-77.2857	2	75	13.22	34.934	1026.59	10.6374	6.19501	0.123	26.3001	0.324709	9.44598	-3.25097
SO243	2015	10	-12.254	-77.077	10	5.77	17.261	35.085	1025.5	131.29	47.323	0.6012	25.5183	0.328242	8.34903	38.974
SO243	2015	10	-12.253	-77.077	10	9.54	16.921	35.076	1025.59	96.03	49.8051	0.5153	25.5927	0.328242	8.4415	41.3636
SO243	2015	10	-12.254	-77.077	10	14.91	16.243	35.066	1025.76	46.03	78.929	1.829	25.7439	0.328242	8.62981	70.2992
SO243	2015	10	-12.254	-77.077	10	25.15	15.81	35.057	1025.9	7.12	64.2833	1.1593	25.8366	0.328242	8.75325	55.53
SO243	2015	10	-12.254	-77.077	10	30.42	15.774	35.055	1025.93	5.07	79.9739	0.4313	25.8434	0.328242	8.76368	71.2102
SO243	2015	10	-12.254	-77.077	10	40.16	15.682	35.051	1025.99	0	80.7206	3.9892	25.8615	0.328242	8.79037	71.9302
SO243	2015	10	-12.254	-77.077	10	48.71	15.654	35.051	1026.04	0	83.2919	1.4176	25.8681	0.328242	8.79845	74.4934
SO243	2015	10	-12.254	-77.077	10	61.73	15.638	35.05	1026.1	0	83.0963	1.2318	25.8714	0.328242	8.80313	74.2932
SO243	2015	10	-12.254	-77.077	10	71.57	15.621	35.05	1026.15	0	81.5848	0.6187	25.8756	0.328242	8.80804	72.7768

## Sheet: StationE
Cruise	Year	Month	Latitude[degN]	Longitude[degE]	Station	Depth[m]	Temperature[degC]	Salinity[PSU]	InSituDensity[kg/m3]	O2[µmol/kg]	N2O[nmol/L]	SD_N2O [nmol/L]	PotDensity,σθ[kg/m3]	N2Oatm[ppm]	N2OSat[nmol/L]	DeltaN2O[nmol/L]
SFB754 (M77/3)	2009	1	-13.499	-76.458	064-1	105.5	13.5194	34.9635	1026.69	2.18	0	0	26.2627	0.322373	9.28205	-9.28205
SFB754 (M77/3)	2009	1	-13.499	-76.458	064-1	100	13.5279	34.965	1026.66	2.23	0	0	26.2619	0.322373	9.27931	-9.27931
SFB754 (M77/3)	2009	1	-13.499	-76.458	064-1	90.3	13.537	34.9655	1026.62	2.15	0	0	26.2602	0.322373	9.27643	-9.27643
SFB754 (M77/3)	2009	1	-13.499	-76.458	064-1	80	13.5518	34.9666	1026.57	2.12	0	0	26.2577	0.322373	9.27174	-9.27174
SFB754 (M77/3)	2009	1	-13.499	-76.458	064-1	69.9	13.5591	34.967	1026.52	2.07	0	0	26.2562	0.322373	9.26944	-9.26944
SFB754 (M77/3)	2009	1	-13.499	-76.458	064-1	59.9	13.5672	34.9676	1026.48	2.05	19.61	0.91487	26.2547	0.322373	9.26688	10.3431
SFB754 (M77/3)	2009	1	-13.499	-76.458	064-1	50.2	13.5893	34.9683	1026.43	2.06	1.46	0.0637043	26.2504	0.322373	9.25994	-7.79994
SFB754 (M77/3)	2009	1	-13.499	-76.458	064-1	40.2	13.6007	34.9687	1026.38	2.05	11.61	0.479776	26.2481	0.322373	9.25636	2.35364
SFB754 (M77/3)	2009	1	-13.499	-76.458	064-1	29.9	13.6319	34.9684	1026.33	2.06	36.11	1.15644	26.2411	0.322373	9.24664	26.8634
SFB754 (M77/3)	2009	1	-13.499	-76.458	064-1	20.2	13.8019	34.9735	1026.25	2.02	34.94	1.55662	26.2094	0.322373	9.1936	25.7464
SFB754 (M77/3)	2009	1	-13.499	-76.458	064-1	10.4	14.0462	34.9754	1026.16	8.21	156.82	8.87253	26.1594	0.322373	9.11839	147.702
SFB754 (M77/3)	2009	1	-13.499	-76.458	064-1	2.6	14.2104	34.9639	1026.08	17.55	16	0.547756	26.1155	0.322373	9.06894	6.93106
AT26-26	2015	1	-13.4983	-76.6005		108	14.186	34.9941	1026.58	0.969	60.1296	0.95954	26.1473	0.327568	9.22109	50.9085
AT26-26	2015	1	-13.4983	-76.6005		95	14.2034	34.9952	1026.52	1.126	64.0296	1.51152	26.1441	0.327568	9.21567	54.8139
AT26-26	2015	1	-13.4983	-76.6005		69	14.2641	34.998	1026.39	1.694	76.5391	1.47304	26.1325	0.327568	9.19684	67.3423
AT26-26	2015	1	-13.4983	-76.6005		53	14.3804	35.0038	1026.3	2.571	84.5792	1.62578	26.1117	0.327568	9.16089	75.4183
AT26-26	2015	1	-13.4983	-76.6005		41	14.5308	35.0096	1026.22	3.091	92.6407	2.98863	26.0835	0.327568	9.11476	83.526
AT26-26	2015	1	-13.4983	-76.6005		35	14.7102	35.0132	1026.16	2.519	103.566	1.85047	26.0474	0.327568	9.06033	94.5061
AT26-26	2015	1	-13.4983	-76.6005		28	15.0442	35.0211	1026.06	4.034	112.741	2.98081	25.9802	0.327568	8.96012	103.781
AT26-26	2015	1	-13.4983	-76.6005		22	15.6536	35.0477	1025.91	23.704	81.5904	2.55565	25.8647	0.327568	8.78063	72.8098
AT26-26	2015	1	-13.4983	-76.6005		16	16.1067	35.0731	1025.8	43.18	68.0682	2.09499	25.7808	0.327568	8.65013	59.4181

## Sheet: StationF
Cruise	Year	Month	Latitude[degN]	Longitude[degE]	Station	Depth[m]	Temperature[degC]	Salinity[PSU]	InSituDensity[kg/m3]	O2[µmol/kg]	N2O[nmol/L]	SD_N2O [nmol/L]	PotDensity,σθ[kg/m3]	N2Oatm[ppm]	N2OSat[nmol/L]	DeltaN2O[nmol/L]
AT26-26	2015	1	-16.2989	-73.9009	49	5	17.5757	34.9239	1025.29	184.597	42.6488	1.07801	25.3188	0.327568	8.25507	34.3937
AT26-26	2015	1	-16.2989	-73.9009	49	10	17.314	34.9277	1025.38	183.564	40.1164	1.07676	25.3851	0.327568	8.32459	31.7919
AT26-26	2015	1	-16.2989	-73.9009	49	15	16.3742	34.9522	1025.64	177.373	43.0286	1.39724	25.6261	0.327568	8.58054	34.448
AT26-26	2015	1	-16.3071	-73.9066	51	38	14.7757	34.9393	1026.1	60.187	59.7609	1.7114	25.9762	0.327568	9.04423	50.7167
AT26-26	2015	1	-16.2989	-73.9009	49	45	14.5862	34.9314	1026.16	42.502	66.8511	1.77254	26.0114	0.327568	9.10179	57.7493
AT26-26	2015	1	-16.3071	-73.9066	51	55	14.0616	34.8935	1026.29	20.128	79.4035	1.35104	26.0942	0.327568	9.26463	70.1389
AT26-26	2015	1	-16.3071	-73.9066	51	65	13.7798	34.898	1026.4	4.899	70.4339	2.3853	26.157	0.327568	9.35251	61.0814
AT26-26	2015	1	-16.3071	-73.9066	51	83	13.7208	34.9151	1026.51	1.234	58.9752	1.42455	26.183	0.327568	9.37023	49.605
AT26-26	2015	1	-16.3071	-73.9066	51	90	13.6319	34.9217	1026.56	0.673	52.4225	1.72524	26.2067	0.327568	9.398	43.0245
AT26-26	2015	1	-16.2989	-73.9009	49	100	13.7702	34.9112	1026.57	1.892	65.9479	1.43347	26.1702	0.327568	9.35486	56.593
AT26-26	2015	1	-16.3071	-73.9066	51	115	13.4836	34.9149	1026.7	0.612	50.1393	1.77342	26.2327	0.327568	9.4455	40.6938
AT26-26	2015	1	-16.3035	-73.904	50	130	13.5007	34.9067	1026.76	0.578	46.1577	1.20509	26.2233	0.327568	9.44047	36.7172
AT26-26	2015	1	-16.3035	-73.904	50	180	13.1993	34.9239	1027.06	0.605	34.3176	0.670741	26.2994	0.327568	9.53635	24.7813
AT26-26	2015	1	-16.2989	-73.9009	49	200	13.1053	34.9142	1027.16	0.583	33.4405	1.14623	26.3114	0.327568	9.56731	23.8732
AT26-26	2015	1	-16.2989	-73.9009	49	225	12.9999	34.9156	1027.3	0.59	40.9983	0.753451	26.3343	0.327568	9.60156	31.3968
NITROP-85'	1985	2	-16.381	-74.6667		1	20.394	34.823	1024.48	253.963	21.11	0.4222	24.5237	0.305081	7.03835	14.0716
NITROP-85'	1985	2	-16.381	-74.6667		48	14.03	34.746	1026.15	79.0915	33.63	0.6726	25.9866	0.305081	8.64468	24.9853
NITROP-85'	1985	2	-16.381	-74.6667		100	13.139	34.877	1026.68	4.95775	27.04	0.5408	26.273	0.305081	8.90217	18.1378
NITROP-85'	1985	2	-16.381	-74.6667		149	12.575	34.875	1027.01	5.52088	15.59	0.3118	26.385	0.305081	9.07492	6.51508
NITROP-85'	1985	2	-16.381	-74.6667		200	12.105	34.853	1027.32	3.77683	24.31	0.4862	26.4604	0.305081	9.22349	15.0865
NITROP-85'	1985	2	-16.381	-74.6667		250	11.651	34.827	1027.61	7.73637	31.13	0.6226	26.5273	0.305081	9.37045	21.7595

## Sheet: NO3-DeltaN2O
Depth[m]	O2[μmol/L]	NO3 [umol/L]	Delta_N2O[nmol/L]
1200.75	63.85	42.234	20.5693
1200.75	63.8	42.384	18.6972
1200.75	63.73	42.84	18.7045
1002.5	66.78	41.958	23.9075
1002.28	55.04	44.043	28.3178
1001.61	54.66	45.045	23.255
1001.56	53.33	44.682	25.8635
1001.12	66.91	42.531	32.6197
1001.08	54.8	44.129	28.3917
1000.78	55.94	43.959	25.0131
1000.34	60.06	45.014	22.644
999.63	54.7	44.813	21.4816
802.12	32.72	45.342	32.747
801.39	41.97	45.999	30.9349
800.98	37.14	46.325	28.8218
800.94	36.74	45.419	38.5748
800.89	30.62	45.98	33.9738
800.8	51.08	42.267	33.3296
800.8	29.59	45.77	34.7305
800.19	22.77	46.375	36.1534
750.28	50.82	42.253	43.3696
701.24	27.15	45.386	41.7013
700.93	14.69	46.3	41.1229
700.79	26.14	45.366	37.3538
699.65	26.38	46.268	35.707
650.9	31.04	44.624	37.3665
650.47	34.48	42.446	54.8993
601.29	21.27	42.248	49.1827
600.9	21.13	41.896	19.0911
600.47	24.67	43.985	43.9906
600.3	18.52	43.941	51.7454
600.3	21.14	44.236	40.2439
599.86	22.34	44.386	43.1837
599.52	6.14	45.036	50.3552
599.51	4.42	45.051	56.1138
591.52	15.04	44.012	54.2473
590.84	22.61	44.186	40.2528
579.94	22.19	43.991	40.0601
550.12	22.39	42.142	68.3625
550.02	19.9	41.119	22.1648
540.58	12.5	43.002	45.6121
501.51	18.13	39.789	53.8053
500.89	3.24	40.729	59.716
500.76	6.78	41.982	59.5469
500.65	1.28	41.793	57.8457
500.23	4.6	40.691	49.2145
500.02	4.84	41.449	49.9553
499.96	14.61	42.609	43.8544
499.43	14.65	41.231	74.0478
499.13	15.54	40.192	21.9028
473.84	3.07	40.596	48.4288
451.86	2.81	39.715	60.8225
450.83	1.18	38.931	45.2979
450.81	9.04	40.156	77.9501
450.63	1.28	39.693	50.0168
450.1	0.74	38.135	54.7304
450.02	6.81	38.213	20.9422
449.27	7.41	40.839	48.0294
400.93	-0.05	28.319	19.6819
400.89	0.29	33.186	19.2259
400.84	0.1	20.546	-1.99552
400.64	0.1	30.544	21.5943
400	4.32	38.727	84.0357
382.72	1.25	35.551	65.5269
374.79	4.69	37.875	87.4534
373.49	6.35	35.975	18.546
352.23	0.48	31.708	20.4237
351.65	6.58	35.346	26.0421
350.42	0.13	25.118	0.341064
349.87	0.12	25.095	7.70064
349.16	0.43	30.08	16.8224
324.75	4.4	35.421	60.0254
323.66	4.64	34.644	25.0112
309.41	0.05	30.677	36.3708
301.31	2.31	32.884	77.6631
301.2	-0.34	18.535	-2.58018
300.32	8.76	34.396	67.7679
300.04	-0.11	27.397	13.1156
299.28	0.26	31.818	64.1083
275.49	16.11	32.571	64.2193
252.65	32.89	30.381	70.4502
252.07	0.18	19.285	-2.92454
251.65	0.01	20.127	-2.56061
250.99	-0.12	29.851	52.4934
250.96	22.74	31.627	57.7194
248.94	0.78	29.902	56.2146
246.35	1.85	26.69	65.6746
240.26	-0.22	24.337	35.8287
228.37	2.7	27.861	63.4852
201.92	0.07	26.807	65.2173
201.9	0.06	17.869	-1.87417
201.79	70.1	25.027	39.4592
201.78	48.86	27.312	40.1164
201.72	0.05	21.384	7.07583
201.24	-0.17	28.481	28.4136
200.62	-0.31	10.313	-3.09143
200.56	9.26	30.789	66.9019
199.7	55.05	27.338	31.6594
190.62	8.59	28.203	58.1175
179.6	25.24	30.274	52.7422
151.38	53.4	26.491	39.6084
151.26	-0.02	15.522	3.41303
151.18	10.11	28.906	55.1094
151.17	0.54	29.443	9.25747
150.76	1.63	26.536	64.3735
150.75	-0.38	14.491	-3.45228
150.46	0.12	16.778	-2.91959
150.05	0.01	13.967	-0.462638
149.8	37.75	29.01	45.2947
131.69	0.68	23.365	36.1852
128.83	44.37	25.921	33.9061
126.53	3.12	29.567	66.6337
125.42	-0.14	17.331	-2.18006
125.23	0.1	17.463	4.50438
121.35	-0.35	14.265	-2.53194
119.69	47.71	25.323	27.3145
119.46	0.08	25.046	41.2159
119.06	0.16	25.187	41.021
116.48	-0.01	25.135	42.6107
110.72	0.01	25.608	47.1259
109.52	-0.15	28.536	44.642
107.24	0.03	25.965	46.749
105.95	0.12	25.474	42.4237
102.2	53.4	24.651	22.7834
101.6	53.35	25.873	33.5269
101.27	0.02	28.455	68.6014
100.89	4.51	29.809	69.8979
100.82	92.66	21.112	22.5018
100.78	0.37	26.579	49.2478
100.48	-0.45	13.585	0.672923
100.42	104.59	18.7	12.297
100.42	82.43	22.257	23.2618
100.4	24.83	28.809	58.4489
100.19	3.79	27.201	53.9983
100.09	24.76	22.801	29.8728
99.9	3.75	27.201	53.998
99.51	66.09	23.937	28.1177
98.69	1.66	30.427	71.3876
95.42	0.34	26.657	46.7841
92.06	55.38	25.559	32.1344
91.44	0.42	26.384	39.4172
91.04	1.43	28.721	63.5454
90.64	-0.39	12.89	4.81109
90.05	0.43	26.866	45.9618
85.97	1.12	27.794	59.2091
81.72	18.2	25.526	29.3582
81.1	1.62	25.734	50.8935
81.01	154.24	19.111	19.8656
80.81	-0.11	10.268	10.9068
80.53	64.23	23.806	18.106
80.11	2.43	27.486	50.9451
77.53	2.28	23.311	54.1838
76.25	16.84	29.3	55.8246
76	5.04	27.537	75.8049
75.86	58.64	24.721	32.5214
75.85	62.22	23.926	25.8934
75.74	11.2	26.643	67.1445
75.54	2.73	18.923	19.465
75.35	5.08	27.537	75.8064
75.34	2.26	27.37	52.4008
74.46	5.2	29.837	68.4007
74.26	47.52	26.209	59.0425
73.25	9.73	25.327	53.8844
71.96	-0.11	9.567	41.192
71.57	-0.2	26.306	72.8638
70.47	2.5	27.451	52.3279
69.97	58.89	27.2	53.0503
66.89	79.38	24.798	44.0779
66.2	8.2	11.12	42.9921
65.5	0.88	26.471	44.286
65.2	0.73	26.471	44.2839
64.41	111.45	21.549	32.0545
61.73	-0.22	26.387	74.3801
61.43	184.76	16.937	15.2336
61.24	72.38	23.737	18.2542
61.03	6.34	27.676	52.559
60.15	62.36	23.892	25.2193
58.84	6.14	27.479	50.4504
58.64	202.35	15.963	12.5933
55.56	202.76	15.834	13.1908
55.56	5.65	27.518	44.5974
55.27	10.48	27.459	48.8208
52.19	30.46	28.215	68.6143
51.39	14.73	27.316	49.6757
51	57.04	25.447	43.1856
51	40.14	26.098	68.6226
50.9	40.45	26.098	68.6225
50.81	55.6	25.516	26.1741
50.71	72.59	22.974	30.0225
50.7	55.62	25.516	26.1736
50.69	192.73	17.921	12.2993
50.4	213.8	12.455	7.72371
50.1	6.8	27.429	49.0263
50.02	119.85	15.654	15.2784
50	134.6	12.02	21.5682
49.9	204.16	15.739	13.8611
49.71	38.41	28.363	46.3109
49.4	157.87	20.734	25.1358
49.32	131.66	14.016	18.5423
48.71	-0.13	26.604	74.5804
48.41	34.11	26.723	48.4846
47.03	144.08	11.136	16.9741
45.34	79.04	23.047	21.891
45.33	206.63	15.497	12.8624
45.33	16.02	27.61	49.9348
45.23	79.22	24.424	39.1272
41.35	25.14	27.213	48.3536
41.25	208.48	15.389	12.2045
41.1	23.83	27.213	52.1763
40.67	88.52	22.864	18.3777
40.27	49.72	26.703	34.402
40.17	70.72	24.536	31.8716
40.16	-0.27	26.763	72.0171
39.86	211.68	10.099	8.21243
36.28	94.07	23.596	19.3768
35.9	198.8	2.39	3.86211
35.69	212.45	10.912	8.00908
35.09	67.05	25.704	19.9514
32.9	94.4	23.469	22.3079
30.92	226.69	12.105	6.92975
30.92	142.4	18.694	13.1732
30.5	57.05	25.7	45.0455
30.43	55.69	26.371	32.9021
30.42	5.07	28.089	71.2968
30.3	55.54	26.371	32.9022
30.22	95.54	22.928	17.1382
30.1	57.74	25.7	49.5857
30.02	96.33	23.052	15.3271
26.14	211.57	14.82	11.8669
25.85	215.92	10.758	6.97378
25.75	210.76	17.534	14.1291
25.45	110.78	21.936	27.168
25.35	149.09	19.166	25.3161
25.25	89.48	23.327	19.3877
25.15	7.12	27.982	55.6165
25.05	93.95	23.594	13.5194
24.96	204.85	5.088	6.79291
24.85	228.91	11.359	6.87878
21.08	217.29	12.99	5.79475
20.88	223.56	9.294	6.03475
20.88	78.07	24.894	73.3501
20.78	58.32	26.006	33.3735
20.6	58.14	26.006	33.3717
20.58	211.44	15.447	14.4359
20.58	67.21	25.012	41.4119
19.79	205.43	4.842	6.99001
19.69	228.12	11.346	6.36049
18.29	107.07	23.043	15.8752
17.4	212.22	11.955	14.7461
16.31	102.92	21.111	23.7354
16.1	229.21	9.033	5.73572
15.71	219.73	16.524	11.9253
15.71	103.65	24.241	55.7429
15.71	77.69	24.621	42.1935
15.31	179.21	17.353	13.7437
15.31	76.1	25.047	31.4158
14.91	46.03	26.633	70.3844
14.71	216.55	14.519	13.0213
14.51	229.12	11.364	3.76123
13.22	212.38	11.092	13.3354
12.13	229.33	11.36	3.84773
11.73	84.53	23.925	38.1597
10.94	221.68	16.387	14.655
10.84	229.5	9.003	5.49411
10.84	116.86	23.534	50.1541
10.34	189.57	15.467	14.0256
10.24	228.96	11.288	5.59611
10.24	142.64	19.076	18.1392
9.94	220.74	13.813	11.7146
9.54	96.03	23.876	41.447
6.56	204.53	0.048	2.44221
6.36	206	4.639	6.0287
6.07	203.41	4.416	6.47964
6.07	216.37	10.652	6.94065
5.9	160.08	19.12	17.9975
5.87	229.98	9.027	5.39959
5.77	131.29	23.055	39.0564
5.67	220.9	16.358	13.7745
5.57	229.03	11.382	5.98962
5.47	212.47	11.127	13.9383
5.47	229.53	11.384	3.74339
5.47	161.09	19.125	17.998
5.37	115.46	22.169	33.8567
5.17	190.95	15.195	13.7721
4.97	187.89	15.289	14.0543
4.87	221.16	13.755	11.2456
4.87	115.61	23.271	49.313
4.38	220.76	11.497	3.95219

## Sheet: N2O-Isotope
Latitude[degN]	Longitude[degE]	Depth[m]	Temperature[degC]	Salinity(PSU)	N2O_mean[nmol/L]	N2O_sd[nmol/L]	N2O_mean-2[nmol/kg]	N2O_sd-2[nmol/kg]	N2O_sat[nmol/L]	Delta_N2O[nmol/L]	Bulk_d15N	d18O	d15N_alpha	d15N_beta	SP
1	-85.5	100.82	15.937	35.046	31.1995	8.3244	30.4728	8.1305	8.69771	22.5018
1	-85.5	50.02	19.678	34.968	22.9985	5.6374	22.4641	5.5064	7.72007	15.2784
1	-85.5	38.19	24.435	34.279	12.6449	1.2155	12.3573	1.1879	6.70323	5.94167
1	-85.5	35.9	24.966	34.104	10.4668	2.2446	10.23	2.1939	6.60469	3.86211
1	-85.5	20.19	26.917	33.437	8.7064	0.5462	8.5133	0.534	6.2601	2.4463
1	-85.5	6.56	26.945	33.426	8.6976	1.0993	8.5051	1.075	6.25539	2.44221
1	-85.5	1200.75	3.925	34.589	33.9269	4.9402	33.1486	4.8268	13.3576	20.5693
1	-85.5	650.07	6.642	34.586	26.374	6.1982	25.7705	6.0563	12.0528	14.3212
1	-85.5	600.9	7.423	34.624	30.799	8.3907	30.0934	8.1985	11.7079	19.0911
1	-85.5	550.02	7.879	34.618	33.6794	6.6761	32.908	6.5232	11.5146	22.1648
1	-85.5	499.13	8.322	34.645	33.2318	6.5168	32.47	6.3674	11.329	21.9028
1	-85.5	450.02	9.577	34.707	31.7681	10.8455	31.0393	10.5967	10.8259	20.9422
1	-85.5	323.66	11.562	34.828	35.1012	6.788	34.2929	6.6317	10.09	25.0112
1	-85.5	373.49	10.673	34.772	28.9569	11.0867	28.2913	10.8318	10.4109	18.546
1	-85.5	351.65	11.085	34.796	36.3027	10.735	35.4686	10.4883	10.2606	26.0421
1	-85.5	252.65	12.968	34.911	80.0604	1.0433	78.2099	1.0192	9.61024	70.4502
1	-85.5	201.79	14.915	34.996	48.4571	0.721	47.3341	0.7043	8.99791	39.4592
1	-85.5	152.1	15.301	35.013	42.8716	1.1596	41.8788	1.1328	8.88296	33.9886
1	-85.5	126.66	15.646	35.031	37.9425	0.9456	37.0633	0.9237	8.7818	29.1607
0	-85.5	1202.23	3.767	34.593	40.7084	3.735	39.7778	3.6496	13.4391	27.2693
0	-85.5	1001.12	4.491	34.572	45.6912	4.3817	44.6499	4.2819	13.0715	32.6197	8.11097	49.5578	17.2197	-0.99775	18.2174
0	-85.5	750.28	5.854	34.569	55.7833	3.2086	54.5122	3.1355	12.4137	43.3696	7.00521	48.2844	15.7326	-1.72221	17.4549
0	-85.5	650.47	6.826	34.596	66.8695	2.3888	65.3444	2.3343	11.9702	54.8993	6.50372	48.7048	14.3873	-1.37988	15.7672
0	-85.5	600.2	7.338	34.612	74.8144	1.8927	73.1094	1.8495	11.7453	63.0691
0	-85.5	550.12	7.675	34.62	79.9631	1.5833	78.1403	1.5472	11.6006	68.3625	6.59873	44.8827	12.2594	0.938044	11.3214
0	-85.5	499.43	8.268	34.642	85.3992	1.8106	83.444	1.7692	11.3514	74.0478	6.43643	46.4809	14.1271	-1.25426	15.3814
0	-85.5	450.81	8.948	34.679	89.024	0.8306	86.986	0.8116	11.0739	77.9501	6.67044	47.6364	14.0664	-0.725492	14.7919
0	-85.5	400	9.718	34.721	94.8066	1.4017	92.6307	1.3695	10.7709	84.0357	6.43271	48.0541	14.5607	-1.69525	16.2559
0	-85.5	374.79	9.97	34.733	98.1277	1.0044	95.8747	0.9814	10.6743	87.4534	6.56705	52.4536	14.693	-1.55893	16.252
0	-85.5	350.56	10.251	34.746	73.7406	6.9061	72.0388	6.7467	10.5681	63.1725	6.40653	52.0257	14.7153	-1.90228	16.6176
0	-85.5	324.75	11.198	34.81	70.2448	3.3834	68.6223	3.3052	10.2194	60.0254
0	-85.5	300.32	11.72	34.828	77.8029	1.8083	76.0049	1.7665	10.035	67.7679	5.92555	49.6256	11.8398	0.0113001	11.8285
0	-85.5	275.49	12.617	34.889	73.9464	3.8461	72.2344	3.757	9.72708	64.2193	4.61152	45.0261	11.0827	-1.85965	12.9423
0	-85.5	250.96	12.957	34.91	67.3333	3.064	65.7715	2.9929	9.61389	57.7194
0	-85.5	199.7	14.334	34.976	40.834	1.6596	39.8861	1.6211	9.17458	31.6594	4.80118	40.5074	9.76009	-0.157727	9.91781
0	-85.5	151.31	15.361	35.027	32.0436	0.0587	31.2986	0.0573	8.86474	23.1789
0	-85.5	126.56	15.668	35.04	27.4631	2.6252	26.8243	2.5641	8.77503	18.6881
0	-85.5	100.42	17.568	35.094	20.545	0.3412	20.0664	0.3332	8.248	12.297	5.05117	40.8869	10.1757	-0.0733944	10.2491
0	-85.5	49.32	19.988	35.05	26.1848	0.692	25.5755	0.6759	7.64249	18.5423	4.46614	40.8055	9.26429	-0.332005	9.5963
0	-85.5	39.98	24.136	34.468	15.6955	0.6658	15.3368	0.6506	6.75651	8.93899	5.24978	42.5043	10.8863	-0.386698	11.273
0	-85.5	20.59	24.563	34.469	14.254	0.0886	13.9282	0.0866	6.67144	7.58256	5.4596	42.0026	11.0983	-0.179152	11.2775
0	-85.5	6.07	24.627	34.468	13.1385	0.1987	12.8383	0.1941	6.65886	6.47964	5.50258	42.5121	11.2861	-0.280963	11.5671
-2.5	-85.5	1002.5	4.529	34.571	36.9601	1.996	36.1107	1.9501	13.0526	23.9075	8.55948	49.8931	18.7601	-1.64114	20.4012
-2.5	-85.5	800.8	5.696	34.568	45.8172	2.7527	44.7643	2.6894	12.4876	33.3296	7.86948	49.3702	17.5386	-1.79961	19.3382
-2.5	-85.5	601.29	7.511	34.61	60.8538	7.5534	59.4536	7.3796	11.6711	49.1827	6.69247	48.7968	15.8932	-2.50825	18.4014
-2.5	-85.5	501.51	8.598	34.658	65.021	2.232	63.5227	2.1806	11.2157	53.8053	6.42406	48.8033	15.1102	-2.2621	17.3723
-2.5	-85.5	382.72	10.428	34.766	76.0281	4.2884	74.2724	4.1893	10.5012	65.5269	6.32567	55.5673	15.7926	-3.14123	18.9338
-2.5	-85.5	301.31	12.268	34.884	87.5074	6.228	85.4816	6.0838	9.8443	77.6631	4.5145	48.1975	10.9135	-1.88448	12.798
-2.5	-85.5	201.78	14.575	35.011	49.2158	0.9555	48.072	0.9333	9.09941	40.1164	4.24691	39.4656	7.99092	0.502891	7.48803
-2.5	-85.5	100.42	15.969	35.056	31.9499	1.1483	31.2073	1.1216	8.68815	23.2618	4.61054	40.1833	8.99145	0.229621	8.76183
-2.5	-85.5	24.96	23.921	34.726	13.5839	0.4867	13.2699	0.4754	6.79099	6.79291	5.54464	41.6953	10.5931	0.49617	10.0969
-2.5	-85.5	47.03	21.281	35.184	24.3121	0.5028	23.7415	0.491	7.33796	16.9741	4.0891	40.0262	7.75721	0.420996	7.33621
-2.5	-85.5	19.79	23.934	34.722	13.7785	1.3052	13.4599	1.2751	6.78849	6.99001	5.6101	42.2793	11.0802	0.14001	10.9402
-2.5	-85.5	6.36	24.114	34.711	12.7813	0.481	12.486	0.4699	6.7526	6.0287
-9.7	-81.7	287.47	12.625	34.907	77.155	0.8012	75.3677	0.7826	9.72346	67.4315
-9.7	-81.7	142.54	14.976	35.032	66.304	1.847	64.764	1.8041	8.978	57.326
-9.7	-81.7	105.57	16.284	35.086	38.6237	0.9223	37.7251	0.9008	8.59788	30.0258
-9.7	-81.7	29.03	18.996	35.178	22.8095	0.4041	22.2774	0.3946	7.87848	14.931
-9.7	-81.7	25.95	20.399	35.254	20.4814	0.2486	20.0024	0.2428	7.53753	12.9439
-9.7	-81.7	4.38	20.511	35.258	12.2626	0.2145	11.9758	0.2094	7.51127	4.75133
-9.775	-81.654	311.49	12.42	34.895	72.5883	2.1746	70.9113	2.1243	9.79253	62.7958
-9.775	-81.654	119.49	16.234	35.087	37.436	1.7145	36.5661	1.6747	8.61186	28.8241
-9.775	-81.654	81.32	17.096	35.104	33.7148	0.738	32.9309	0.7208	8.37371	25.3411
-9.775	-81.653	33.21	18.729	35.159	25.9601	0.7274	25.3548	0.7104	7.94595	18.0142
-9.775	-81.653	27.54	20.385	35.255	15.7359	0.3095	15.3675	0.3023	7.54076	8.19514
-9.775	-81.653	4.57	20.6	35.258	11.6586	0.1701	11.385	0.1661	7.49062	4.16798
-10.044	-81.659	314.27	12.042	34.869	57.5832	1.0265	56.2461	1.0027	9.92189	47.6613
-10.044	-81.659	175.13	14.516	35.012	71.5458	2.0066	69.8752	1.9598	9.11726	62.4285
-10.044	-81.659	99.61	16.347	35.087	43.4458	0.544	42.4291	0.5313	8.58021	34.8656
-10.044	-81.659	42.45	19.752	35.239	29.6212	0.7114	28.9247	0.6947	7.69138	21.9298
-10.044	-81.659	40.47	20.133	35.246	21.4683	1.0556	20.964	1.0309	7.60034	13.868
-10.044	-81.659	4.87	20.561	35.258	11.5613	0.1187	11.2896	0.1159	7.49966	4.06164
-9.999	-81.917	60.15	17.43	35.119	33.5028	0.8303	32.7198	0.8109	8.28351	25.2193	3.96495	39.8984	7.55391	0.375997	7.17791
-10	-81.917	45.34	18.141	35.147	29.9871	0.6767	29.2857	0.6609	8.09609	21.891	3.67557	39.7023	5.52958	1.82157	3.70801
-9.999	-81.917	30.92	19.242	35.175	20.9911	0.3875	20.4991	0.3784	7.81785	13.1732	3.81257	40.5763	9.6416	-2.01646	11.6581
-10	-81.917	21.08	20.44	35.249	13.3229	0.2973	13.01	0.2903	7.52815	5.79475	4.6389	41.7555	11.4257	-2.1479	13.5736
-9.999	-81.917	4.38	20.551	35.252	11.4544	0.102	11.1853	0.0996	7.50221	3.95219	5.25005	40.9633	9.94322	0.556876	9.38635
-9.999	-81.917	1001.56	4.454	34.548	38.9554	0.4255	38.064	0.4158	13.0919	25.8635	8.4083	50.2372	18.1499	-1.33334	19.4833
-10	-81.917	800.19	5.703	34.549	48.6391	1.046	47.5261	1.0221	12.4857	36.1534	7.52687	49.9069	17.4465	-2.39272	19.8392
-10	-81.917	599.51	7.058	34.576	67.9832	0.5825	66.4262	0.5692	11.8694	56.1138	6.03374	50.0077	14.5962	-2.52873	17.1249
-9.9994	-81.9167	401.4	10.6387	34.7712	30.1056	0.5899	29.4119	0.5763	10.4234	19.6819	12.2362	79.2948	28.6678	-4.19542	32.8632
-9.999	-81.917	299.28	12.655	34.91	73.8216	0.7811	72.1133	0.763	9.71335	64.1083	4.79669	49.0736	10.5919	-0.998564	11.5905
-9.99944	-81.9167	299.4	12.6516	34.9103	73.8216	0.7811	72.1133	0.763	9.71446	64.1083	4.79669	49.0736	10.5919	-0.998564	11.5905
-10	-81.917	200.56	13.971	34.98	76.1885	1.7494	74.4238	1.7089	9.28657	66.9019	3.67748	43.0598	8.28103	-0.926075	9.20711
-9.999	-81.917	151.38	15.359	35.057	48.4723	0.6596	47.347	0.6443	8.8639	39.6084	4.49393	39.7997	6.85197	2.13588	4.71609
-10	-81.917	99.51	16.659	35.1	36.6108	0.561	35.7596	0.548	8.49308	28.1177	4.82207	40.7747	7.76462	1.87951	5.88511
-10	-81.917	75.85	17.172	35.108	34.2464	0.9113	33.4501	0.8901	8.35304	25.8934
-9.513	-80.307	101.6	15.424	35.046	42.3724	0.2317	41.389	0.2263	8.84545	33.5269
-9.513	-80.307	92.06	15.632	35.056	40.9191	1.0758	39.968	1.0508	8.78466	32.1344	5.09021	41.0259	8.32521	1.8552	6.47001
-9.513	-80.307	75.86	16.108	35.089	41.1686	0.2052	40.2107	0.2004	8.64725	32.5214	5.29039	40.5174	10.2991	0.281651	10.0175
-9.513	-80.307	50.71	17.754	35.143	38.2194	0.3091	37.3287	0.3019	8.19689	30.0225	3.61893	39.7983	4.78639	2.45147	2.33492
-9.513	-80.307	35.69	20.034	35.149	15.6367	0.6872	15.2722	0.6711	7.62762	8.00908	7.12642	45.5475	13.6553	0.597532	13.0578
-9.513	-80.307	25.85	20.061	35.149	14.595	0.0322	14.2552	0.0314	7.62122	6.97378	6.80318	45.5523	7.64382	5.96254	1.68127
-9.513	-80.307	6.07	20.06	35.149	14.5621	0.2123	14.2234	0.2074	7.62145	6.94065	5.54046	43.4206	8.06713	3.01379	5.05334
-9.513	-80.307	1000.78	4.389	34.554	38.1372	0.2701	37.2654	0.2639	13.1241	25.0131	9.2489	51.3251	17.4389	1.0589	16.38
-9.513	-80.307	800.89	5.328	34.547	46.6375	1.4184	45.5691	1.3859	12.6637	33.9738	8.42753	51.7918	17.291	-0.435939	17.7269
-9.513	-80.307	700.93	6.059	34.559	53.4423	1.6545	52.2175	1.6166	12.3194	41.1229	7.86492	51.4176	15.5598	0.170082	15.3897
-9.513	-80.307	599.52	7.032	34.59	62.2351	0.2855	60.8057	0.2789	11.8799	50.3552	6.71457	51.2698	14.2443	-0.815201	15.0595
-9.513	-80.307	500.65	8.128	34.623	69.2561	0.6331	67.6638	0.6186	11.4104	57.8457	7.09722	56.6761	22.2251	-8.03061	30.2557
-9.513	-80.307	400.64	10.221	34.744	32.1737	0.1913	31.4312	0.1869	10.5794	21.5943
-9.513	-80.307	309.41	11.932	34.862	46.3308	0.9668	45.2577	0.9444	9.95995	36.3708	7.95338	61.734	16.3605	-0.453719	16.8142
-9.513	-80.307	248.94	13.074	34.933	65.7891	0.9579	64.2621	0.9356	9.57453	56.2146	5.85597	53.2287	11.3279	0.384024	10.9439
-9.513	-80.307	179.6	13.991	34.985	62.0223	2.0032	60.5787	1.9566	9.28009	52.7422	4.62761	40.6375	8.75777	0.497454	8.26032
-9.513	-80.307	149.8	14.43	35.015	54.438	1.4746	53.1713	1.4403	9.1433	45.2947	4.63861	39.7056	5.5885	3.68872	1.89978
-9.513	-80.307	120.18	14.938	35.04	45.8858	0.837	44.8185	0.8176	8.98893	36.8969
-9.183	-79.463	128.83	15.463	35.056	42.7397	4.0232	41.7463	3.9297	8.83363	33.9061	4.81662	42.1269	7.18016	2.45307	4.72709
-9.183	-79.463	119.69	15.941	35.084	36.0093	0.7049	35.1716	0.6885	8.69481	27.3145	4.80653	42.3704	8.15493	1.45813	6.69681
-9.183	-79.463	102.2	16.231	35.099	31.3956	2.2782	30.6649	2.2252	8.61215	22.7834	4.73576	42.0702	6.87919	2.59234	4.28685
-9.183	-79.463	80.53	16.98	35.122	26.5103	1.7847	25.8929	1.7431	8.40432	18.106	4.90104	41.7676	8.89897	0.903108	7.99586
-9.183	-79.463	61.24	17.482	35.124	26.5237	1.588	25.9052	1.551	8.26948	18.2542	5.29343	43.7846	5.08409	5.50276	-0.418674
-9.183	-79.463	40.67	17.953	35.13	26.5232	0.7594	25.9053	0.7417	8.14549	18.3777	5.57139	44.1405	0.984974	10.1578	-9.17284
-9.183	-79.464	25.35	19.307	35.161	33.1186	0.5797	32.3463	0.5662	7.80248	25.3161
-9.183	-79.464	17.4	20.053	35.164	22.3686	0.3114	21.8469	0.3041	7.62252	14.7461
-9.183	-79.464	13.22	20.052	35.164	20.9582	0.1039	20.4694	0.1015	7.62276	13.3354
-9.183	-79.464	5.47	20.051	35.164	21.5613	0.3112	21.0579	0.3039	7.62299	13.9383
-9	-78.9	81.72	16.002	35.077	37.9698	1.9127	37.0877	1.8683	8.6778	29.3582	5.22695	46.4051	6.1314	4.32249	1.80891
-9.00001	-78.8999	50.7	16.2522	35.0929	34.7144	1.1473	33.9066	1.1206	8.60648	26.1736	5.14272	42.7375	3.42522	6.86021	-3.43499
-9	-78.9	40.27	16.619	35.096	42.8414	0.4749	41.8432	0.4638	8.50429	34.402	4.01005	41.1035	2.93574	5.08435	-2.14861
-9.00004	-78.8999	30.3	17.1115	35.1102	41.2076	0.6046	40.247	0.5905	8.36925	32.9022	3.55503	40.1866	2.85194	4.25812	-1.40618
-9.00006	-78.8999	20.6	17.1922	35.1123	41.6554	1.5389	40.6833	1.5029	8.34742	33.3717	3.26075	39.899	0.299138	6.22235	-5.92321
-9	-78.9	15.31	17.423	35.115	39.6381	1.2904	38.7129	1.2602	8.28555	31.4158	3.50092	40.4009	-0.189019	7.19087	-7.37988
-9	-78.9	10.24	18.208	35.11	26.1579	0.6355	25.5475	0.6207	8.08042	18.1392	3.62857	42.5891	-1.08132	8.33845	-9.41977
-9.00006	-78.9	5.9	18.2102	35.1118	26.0156	0.626	25.4091	0.6114	8.07977	17.9975	3.71054	42.5981	0.120863	7.30022	-7.17935
-10.715	-78.235	246.35	13.418	34.95	75.0651	3.4446	73.3218	3.3646	9.46271	65.6746	4.36005	51.7684	9.12741	-0.407304	9.53472
-10.715	-78.235	240.88	13.451	34.952	73.659	0.4916	71.9442	0.4802	9.45206	64.2791	4.2865	51.2229	9.34665	-0.773646	10.1203
-10.715	-78.235	228.37	13.65	34.964	72.8017	2.5686	71.1043	2.5088	9.38818	63.4852	4.26851	49.912	8.86996	-0.332931	9.20289
-10.715	-78.235	210.99	14.04	34.983	70.5062	3.0852	68.8633	3.0133	9.26495	61.312	4.04457	48.3327	8.01165	0.0774914	7.93416
-10.715	-78.235	190.62	14.431	35.005	67.1912	0.9438	65.6245	0.9218	9.14348	58.1175	4.28177	45.7612	7.23047	1.33306	5.89741
-10.715	-78.235	170.95	14.534	35.01	50.7484	1.7677	49.5649	1.7265	9.11189	41.7061	4.13417	44.3177	5.59863	2.6697	2.92893
-10.715	-78.235	151.18	14.544	35.01	64.1487	1.3696	62.6527	1.3377	9.10886	55.1094	4.07854	44.0125	5.74451	2.41257	3.33194
-10.715	-78.235	121.17	14.785	35.022	71.0447	0.4403	69.3873	0.4301	9.03555	62.0781	3.59803	40.1292	7.25694	-0.0608723	7.31781
-10.715	-78.235	100.4	15.312	35.046	67.2593	1.5955	65.689	1.5583	8.87817	58.4489	3.65279	39.5389	5.85228	1.4533	4.39898
-10.715	-78.235	74.26	16.551	35.078	67.5013	1.3192	65.9238	1.2883	8.5239	59.0425	2.57461	45.689	5.78184	-0.632625	6.41447
-10.715	-78.235	51	17.22	35.106	51.4622	1.4162	50.2586	1.3831	8.34022	43.1856	3.23866	43.0058	6.37883	0.0984779	6.28036
-10.715	-78.235	40.17	17.73	35.129	40.0128	0.9784	39.0763	0.9555	8.20379	31.8716
-10.715	-78.235	25.45	18.627	35.171	35.0783	5.8696	34.2562	5.7321	7.97113	27.168
-10.715	-78.235	16.31	18.859	35.179	31.5876	4.4829	30.8472	4.3778	7.91255	23.7354
-10.715	-78.235	4.97	19.752	35.246	21.6867	0.6495	21.1773	0.6343	7.6911	14.0543
-12.254	-77.077	71.57	15.621	35.05	81.5848	0.6187	79.6732	0.6042	8.78812	72.8638
-12.254	-77.077	61.73	15.638	35.05	83.0963	1.2318	81.1515	1.203	8.78322	74.3801
-12.254	-77.077	48.71	15.654	35.051	83.2919	1.4176	81.3425	1.3844	8.77855	74.5804
-12.254	-77.077	40.16	15.682	35.051	80.7206	3.9892	78.8314	3.8959	8.77049	72.0171
-12.254	-77.077	30.42	15.774	35.055	79.9739	0.4313	78.0997	0.4212	8.74386	71.2968
-12.254	-77.077	25.15	15.81	35.057	64.2833	1.1593	62.7762	1.1312	8.73346	55.6165
-12.254	-77.077	14.91	16.243	35.066	78.929	1.829	77.0773	1.7861	8.6103	70.3844
-12.253	-77.077	9.54	16.921	35.076	49.8051	0.5153	48.6358	0.5032	8.42241	41.447
-12.254	-77.077	5.77	17.261	35.085	47.323	0.6012	46.2117	0.587	8.33015	39.0564
-12.364	-77.438	246.13	13.27	34.941	52.0984	0.0389	50.8789	0.038	9.51068	42.5877
-12.364	-77.438	199.35	13.581	34.958	62.5276	0.558	61.0632	0.5449	9.41036	53.1172
-12.364	-77.438	150.18	14.336	34.999	66.953	23.4253	65.3848	22.8766	9.17282	57.7802
-12.364	-77.438	200.05	13.58	34.958	61.5697	2.5747	60.1311	2.5146	9.41067	52.159
-12.364	-77.438	76.25	15.784	35.063	64.5652	1.4956	63.0518	1.4605	8.74062	55.8246
-12.364	-77.438	49.71	16.399	35.079	54.877	1.5133	53.5916	1.4779	8.56607	46.3109
-12.364	-77.438	15.31	19.006	35.271	21.6159	1.158	21.1066	1.1308	7.87217	13.7437
-12.364	-77.438	10.34	19.188	35.287	21.8521	0.0124	21.337	0.0121	7.82655	14.0256
-12.364	-77.438	5.17	19.221	35.29	21.5904	0.553	21.082	0.54	7.81831	13.7721
-12.893	-78.272	800.8	5.375	34.529	47.373	0.5479	46.287	0.5354	12.6425	34.7305
-12.893	-78.272	701.24	6.021	34.521	54.0409	1.5944	52.8024	1.5578	12.3396	41.7013
-12.893	-78.272	591.52	7.054	34.556	66.1198	1.288	64.6028	1.2585	11.8725	54.2473
-12.893	-78.272	500.89	8.168	34.613	71.1105	0.1923	69.4761	0.1879	11.3945	59.716
-12.893	-78.272	450.1	9.002	34.656	65.7843	1.1035	64.2703	1.0781	11.0539	54.7304
-12.893	-78.272	400.89	9.815	34.709	29.9605	0.3294	29.2698	0.3218	10.7346	19.2259
-12.893	-78.272	349.87	10.75	34.771	18.0835	0.1752	17.6658	0.1712	10.3829	7.70064
-12.893	-78.272	300.04	11.833	34.853	23.1101	3.2696	22.575	3.1939	9.99453	13.1156
-12.893	-78.272	250.99	12.46	34.898	62.2724	0.2113	60.8268	0.2064	9.77897	52.4934
-12.893	-78.272	201.24	12.995	34.927	38.0142	0.1034	37.1309	0.101	9.60058	28.4136
-12.893	-78.272	151.17	13.703	34.966	18.6288	0.2133	18.1949	0.2083	9.37133	9.25747
-12.893	-78.272	126.53	14.074	34.984	75.888	2.0607	74.1196	2.0127	9.25434	66.6337
-12.893	-78.272	100.89	14.274	34.995	79.0899	1.451	77.2463	1.4172	9.19205	69.8979
-12.893	-78.272	74.46	14.537	35.009	77.5117	4.2017	75.7041	4.1037	9.11103	68.4007
-12.893	-78.272	52.19	15.629	35.063	77.3995	1.0612	75.5937	1.0364	8.7852	68.6143	5.73873	44.0008	12.1956	-0.718136	12.9137
-12.893	-78.272	30.92	18.794	35.296	14.8537	0.7575	14.5047	0.7397	7.92395	6.92975	5.6601	43.5705	11.6212	-0.300975	11.9222
-12.893	-78.272	19.69	18.931	35.307	14.2498	0.3114	13.9149	0.3041	7.88931	6.36049
-12.893	-78.272	10.24	18.949	35.308	13.4809	0.4825	13.164	0.4711	7.88479	5.59611
-12.893	-78.272	5.57	18.946	35.307	13.8752	0.5027	13.5495	0.4909	7.88558	5.98962
-14.65	-77.734	1001.08	4.419	34.537	41.502	2.0257	40.5481	1.9791	13.1103	28.3917
-14.65	-77.734	802.12	5.384	34.521	45.3858	1.2013	44.3432	1.1737	12.6388	32.747
-14.65	-77.734	700.79	5.977	34.522	49.7137	0.3328	48.5715	0.3251	12.3599	37.3538
-14.65	-77.734	600.3	6.669	34.537	52.288	1.5	51.0862	1.4655	12.0441	40.2439
-14.65	-77.734	499.96	7.595	34.574	55.492	5.7081	54.2151	5.5768	11.6376	43.8544
-14.65	-77.734	449.27	8.259	34.605	59.3869	0.4704	58.0207	0.4596	11.3575	48.0294
-14.65	-77.734	352.23	10.076	34.718	31.059	1.3549	30.342	1.3236	10.6353	20.4237
-14.65	-77.734	151.26	13.12	34.893	12.9747	0.0935	12.6735	0.0914	9.56167	3.41303
-14.65	-77.734	131.69	13.604	34.89	45.5917	0.2039	44.5348	0.1992	9.40653	36.1852
-14.65	-77.734	81.01	16.645	35.15	28.3603	1.908	27.6969	1.8634	8.49468	19.8656
-14.65	-77.734	50.4	18.015	35.324	15.8448	0.4638	15.4722	0.4529	8.12109	7.72371
-14.65	-77.734	24.85	18.555	35.362	14.8601	3.9766	14.5106	3.883	7.98132	6.87878
-14.65	-77.734	14.51	18.554	35.362	11.7428	0.2644	11.4667	0.2582	7.98157	3.76123
-14.65	-77.734	12.13	18.551	35.361	11.8301	0.083	11.5515	0.0811	7.98237	3.84773
-14.65	-77.734	5.47	18.542	35.362	11.728	0.1277	11.4513	0.1247	7.98461	3.74339
-14.403	-77.281	1002.28	4.381	34.539	41.447	1.024	40.4932	1.0005	13.1292	28.3178
-14.403	-77.281	800.94	5.353	34.514	51.2289	0.548	50.0522	0.5354	12.6541	38.5748
-14.403	-77.281	600.3	6.858	34.54	63.7053	2.1984	62.2408	2.1479	11.9599	51.7454
-14.403	-77.281	500.76	7.899	34.591	71.0549	4.9412	69.419	4.8275	11.508	59.5469
-14.403	-77.281	451.86	8.588	34.625	72.0443	2.4472	70.3838	2.3908	11.2218	60.8225
-14.403	-77.281	349.16	10.29	34.746	27.3759	1.637	26.7426	1.5991	10.5535	16.8224
-14.403	-77.281	252.07	11.722	34.831	7.1096	0.8069	6.944	0.7881	10.0341	-2.92454
-14.403	-77.281	201.72	12.509	34.887	16.839	0.3601	16.4459	0.3517	9.76317	7.07583
-14.403	-77.281	150.46	12.94	34.913	6.6997	0.0272	6.5432	0.0266	9.61929	-2.91959
-14.403	-77.281	125.23	13.214	34.903	14.0351	0.3206	13.7073	0.3131	9.53072	4.50438	11.8817	75.0489	32.4781	-8.71457	41.1926
-14.403	-77.281	100.09	13.521	34.833	39.3086	0.7039	38.3926	0.6875	9.43583	29.8728	6.44244	54.2808	14.8051	-1.92023	16.7253
-14.403	-77.281	75.74	14.668	34.972	76.2177	0.4703	74.434	0.4593	9.07319	67.1445	3.3333	52.4202	10.3079	-3.64131	13.9492
-14.403	-77.281	49.4	16.364	35.079	33.7116	1.6987	32.9201	1.6588	8.57583	25.1358	3.34085	46.1956	6.78521	-0.103514	6.88873
-14.403	-77.281	25.75	16.852	35.092	22.5696	0.4779	22.0395	0.4667	8.44051	14.1291	3.40589	45.1549	6.58708	0.224695	6.36239
-14.403	-77.281	15.71	16.958	35.099	20.3366	1.1572	19.8588	1.13	8.41132	11.9253	3.55838	45.0496	7.82376	-0.707005	8.53076
-14.404	-77.281	10.94	16.983	35.1	23.0595	3.1494	22.5177	3.0754	8.40449	14.655	3.91972	45.3306	8.4246	-0.585154	9.00975
-14.403	-77.281	5.67	16.97	35.1	22.1825	3.1437	21.6613	3.0698	8.40802	13.7745	3.50324	45.6741	7.34667	-0.340183	7.68685
-14.036	-76.528	240.26	13.16	34.929	45.3027	1.2222	44.2451	1.1936	9.54684	35.8287	4.49502	61.4371	18.4421	-9.45203	27.8941
-14.036	-76.528	201.92	13.692	34.963	74.5207	5.5899	72.7772	5.4591	9.37496	65.2173	3.62229	52.0129	11.4679	-4.22328	15.6911
-14.036	-76.528	150.76	14.329	34.995	73.4786	1.842	71.7539	1.7988	9.17517	64.3735	2.83418	48.6198	8.08921	-2.42085	10.5101
-14.036	-76.5278	99.9	14.7732	35.0182	62.9683	1.2957	61.4875	1.2652	9.03928	53.998	2.95552	46.8384	7.65762	-1.74658	9.4042
-14.0361	-76.5278	76	14.9298	35.0256	84.7283	3.6115	82.7354	3.5265	8.99207	75.8049	2.82708	46.3913	6.96295	-1.3088	8.27174
-14.0361	-76.5278	50.9	15.4739	35.0441	77.3861	1.8623	75.5668	1.8185	8.83102	68.6225	5.35517	44.7153	19.7673	-9.05695	28.8242
-14.036	-76.528	20.88	15.702	35.051	82.0479	1.6176	80.1209	1.5796	8.76473	73.3501	2.59429	43.5023	5.27494	-0.0863644	5.3613
-14.036	-76.528	15.71	15.86	35.049	64.3959	0.468	62.8836	0.457	8.71953	55.7429	2.50009	43.5992	5.05723	-0.0570374	5.11426
-14.036	-76.528	10.84	15.993	35.048	58.7695	0.9566	57.3909	0.9342	8.6817	50.1541	3.35604	44.8587	9.237	-2.52493	11.7619
-14.036	-76.528	4.87	15.981	35.049	57.9318	1.1288	56.5744	1.1024	8.68506	49.313	3.05581	44.6676	7.55872	-1.44711	9.00583
-16.075	-76.579	101.27	14.115	34.977	77.8434	0.799	75.9905	0.78	9.24199	68.6014
-16.075	-76.579	75.54	14.712	35.012	28.523	1.3781	27.8441	1.3453	9.05798	19.465	4.22562	55.7389	13.2287	-4.77742	18.0061
-16.075	-76.579	50.69	16.806	35.134	20.7505	0.3929	20.2548	0.3836	8.4512	12.2993	4.80397	48.0434	9.83111	-0.223175	10.0543
-16.075	-76.579	20.58	17.24	35.183	22.7674	0.3943	22.2233	0.3849	8.33146	14.4359	4.97934	47.1075	9.58296	0.375729	9.20723
-16.075	-76.579	14.71	17.32	35.195	21.3308	0.3925	20.8214	0.3831	8.30951	13.0213	5.12883	47.042	9.50899	0.748668	8.76032
-16.075	-76.579	9.94	17.527	35.219	19.968	0.0149	19.4908	0.0145	8.2534	11.7146
-16.075	-76.579	4.87	17.556	35.22	19.4913	0.4626	19.0261	0.4516	8.24568	11.2456	5.20893	46.2497	10.1242	0.293622	9.83062
-16.075	-76.579	1001.61	4.463	34.533	36.3435	0.8559	35.4854	0.8357	13.0885	23.255
-16.075	-76.579	800.98	5.337	34.515	41.4835	0.1833	40.5045	0.179	12.6617	28.8218	7.61471	50.0676	18.7437	-3.51427	22.258
-16.075	-76.579	699.65	6.016	34.521	48.0489	0.5226	46.9147	0.5102	12.3419	35.707
-16.075	-76.579	599.86	6.954	34.535	55.1016	0.4977	53.8018	0.4859	11.9179	43.1837	7.01853	51.9467	17.3261	-3.28908	20.6152
-16.075	-76.579	500.02	8.368	34.612	61.2675	0.894	59.8173	0.8728	11.3122	49.9553	6.20324	55.0879	18.7026	-6.2961	24.9987
-16.075	-76.579	450.63	8.887	34.644	61.1172	1.7096	59.6692	1.6691	11.1004	50.0168
-16.075	-76.579	350.42	10.758	34.766	10.7213	0.1658	10.4663	0.1619	10.3802	0.341064
-16.075	-76.579	251.65	11.845	34.827	7.4312	0.1719	7.2541	0.1678	9.99181	-2.56061
-16.075	-76.579	201.9	12.496	34.871	7.8942	0.1194	7.7057	0.1165	9.76837	-1.87417
-16.075	-76.579	150.05	13.104	34.884	9.1047	0.247	8.8875	0.2411	9.56734	-0.462638
-16.075	-76.579	125.42	13.699	34.943	7.1937	0.2485	7.0217	0.2426	9.37376	-2.18006
-16.075	-76.579	999.63	4.463	34.532	34.5702	0.2872	33.7547	0.2804	13.0886	21.4816
-16.075	-76.579	650.9	6.361	34.514	49.5509	1.2592	48.3828	1.2296	12.1844	37.3665
-16.075	-76.579	579.94	6.987	34.536	51.9634	0.3144	50.7376	0.307	11.9033	40.0601
-16.075	-76.579	540.58	7.649	34.569	57.2271	0.3841	55.8758	0.3751	11.615	45.6121
-16.075	-76.579	473.84	8.58	34.625	59.6538	1.0338	58.2427	1.0094	11.225	48.4288
-16.075	-76.579	450.83	8.98	34.649	56.3609	0.4794	55.0268	0.468	11.063	45.2979	5.2596	55.1001	15.9391	-5.41985	21.3589
-16.075	-76.579	109.52	13.991	34.977	53.9225	1.739	52.6334	1.6974	9.28049	44.642	3.73109	68.2024	14.8537	-7.39149	22.2452
-16.075	-76.579	98.69	14.295	34.995	80.5732	0.5026	78.6461	0.4905	9.1856	71.3876	3.40052	45.8119	10.7193	-3.91822	14.6375
-16.075	-76.579	91.04	14.359	34.998	72.7112	0.5076	70.9719	0.4954	9.16583	63.5454	3.91065	48.1067	12.1172	-4.29591	16.4131
-16.075	-76.579	85.97	14.459	35.002	68.3442	0.7137	66.7092	0.6966	9.1351	59.2091	2.60355	48.3683	6.6306	-1.42349	8.05409
-16.075	-76.579	81.1	14.525	34.999	60.0087	0.4629	58.5748	0.4518	9.11517	50.8935	2.8223	50.2426	7.50735	-1.86275	9.3701
-16.075	-76.579	77.53	14.669	34.992	63.2557	0.6176	61.7446	0.6029	9.07192	54.1838	3.8928	59.2515	11.3263	-3.54068	14.867
-16.075	-76.579	73.25	14.934	35.007	62.8761	6.4782	61.3733	6.3233	8.99172	53.8844	3.96601	54.0784	9.56221	-1.63019	11.1924
-16.075	-76.579	69.97	15.267	35.023	61.9428	1.7682	60.4616	1.7259	8.89246	53.0503	2.72728	47.5768	6.44002	-0.985461	7.42548
-16.075	-76.579	66.89	15.507	35.04	52.8995	0.3359	51.634	0.3279	8.8216	44.0779	3.16008	50.1392	7.24383	-0.923677	8.16751
-16.075	-76.579	64.41	15.955	35.07	40.746	1.5986	39.7703	1.5603	8.69148	32.0545	3.80176	50.0009	7.48042	0.123101	7.35732
-16.075	-76.579	61.43	16.805	35.138	23.6849	1.0135	23.1166	0.9892	8.45129	15.2336	4.44065	48.0361	9.48993	-0.608624	10.0986
-16.075	-76.579	58.64	16.897	35.135	21.0196	1.0262	20.5153	1.0016	8.42631	12.5933	5.15732	49.1368	12.6783	-2.36369	15.042
-16.075	-76.579	55.56	16.942	35.143	21.6045	0.3896	21.0877	0.3803	8.41371	13.1908	5.26522	48.7672	13.5982	-3.06779	16.666
-16.075	-76.579	49.9	17.06	35.16	22.2421	0.1892	21.7104	0.1847	8.38096	13.8611	6.57483	48.5284	19.3092	-6.15952	25.4687
-16.075	-76.579	45.33	17.165	35.172	21.2145	0.257	20.7072	0.2508	8.3521	12.8624	7.38257	47.9886	24.2455	-9.48041	33.726
-16.075	-76.579	41.25	17.202	35.177	20.5464	0.4475	20.0544	0.4368	8.34193	12.2045	4.6229	46.1544	9.94767	-0.701879	10.6496
-16.075	-76.579	26.14	17.307	35.193	20.18	0.2321	19.6966	0.2265	8.31308	11.8669	4.90267	46.5459	9.77939	0.0259448	9.75345
-15.674	-75.895	1000.34	4.324	34.531	35.8026	0.3871	34.9618	0.378	13.1586	22.644	8.79917	51.1143	20.2682	-2.66989	22.9381
-15.674	-75.895	801.39	5.331	34.506	43.6002	0.1651	42.577	0.1612	12.6653	30.9349	8.25474	50.9451	19.3387	-2.82917	22.1678
-15.674	-75.895	600.47	7.114	34.535	55.8383	0.1869	54.5261	0.1834	11.8477	43.9906	6.87626	51.6461	17.5489	-3.79637	21.3453
-15.674	-75.895	500.23	8.64	34.617	60.4158	0.7231	58.9933	0.7061	11.2013	49.2145	4.798	50.4592	12.3858	-2.78984	15.1757
-15.674	-75.895	400.84	10.722	34.768	8.3977	0.147	8.1989	0.1436	10.3932	-1.99552	15.2532	92.4827	36.4767	-5.97034	42.447
-15.674	-75.895	301.2	12.531	34.886	7.1757	0.1377	7.0052	0.1344	9.75588	-2.58018	12.7474	90.0398	34.4607	-8.96599	43.4267
-15.674	-75.895	200.62	13.469	34.936	6.3557	0.1038	6.2032	0.1013	9.44713	-3.09143	14.2186	85.9368	36.988	-8.55082	45.5388
-15.674	-75.895	150.75	14.121	34.976	5.7879	0.3302	5.6488	0.3223	9.24018	-3.45228	14.1913	78.9787	30.4591	-2.07642	32.5355
-15.674	-75.895	121.35	14.46	34.995	6.6032	0.2032	6.4445	0.1983	9.13514	-2.53194	11.4153	81.9343	29.969	-7.13844	37.1074
-15.674	-75.895	100.48	14.644	35.004	9.7518	0.0965	9.5174	0.094	9.07888	0.672923	9.62213	84.2146	32.4364	-13.1921	45.6285
-15.674	-75.895	90.64	14.72	35.007	13.8669	0.4115	13.5333	0.4016	9.05581	4.81109	11.2346	86.0942	36.7211	-14.2518	50.9729
-15.674	-75.895	80.81	14.767	35.009	19.9484	0.461	19.4685	0.4499	9.04159	10.9068	11.5206	78.3233	33.2451	-10.2039	43.449
-15.674	-75.895	71.96	14.871	35.014	50.2022	0.5189	48.9944	0.5064	9.01018	41.192	12.0474	74.4457	31.8917	-7.79689	39.6886
-15.674	-75.895	66.2	15.073	35.031	51.9414	0.3142	50.692	0.3053	8.94927	42.9921	11.1146	72.1621	28.5903	-6.3611	34.9514
-15.674	-75.895	50	16.684	35.18	30.0508	0.7959	29.3221	0.7766	8.48259	21.5682	9.02473	63.5822	21.5061	-3.45665	24.9628
-15.674	-75.895	39.86	17.664	35.276	16.4272	0.4075	16.0281	0.3976	8.21477	8.21243	7.66219	54.4855	17.7149	-2.39048	20.1053
-15.674	-75.895	20.88	17.797	35.286	14.2142	0.4072	13.8688	0.3973	8.17945	6.03475
-15.674	-75.895	16.1	17.9	35.286	13.8883	0.2561	13.5514	0.2499	8.15258	5.73572	8.12478	52.5456	15.9548	0.294793	15.66
-15.674	-75.895	10.84	17.923	35.286	13.6407	0.5367	13.3102	0.5237	8.14659	5.49411	7.84081	51.7572	16.0016	-0.319989	16.3216
-15.674	-75.895	5.87	17.936	35.286	13.5428	0.1527	13.2147	0.149	8.14321	5.39959	8.01506	52.1287	16.1347	-0.104527	16.2392
-15.318	-75.275	119.46	14.059	34.978	50.4045	1.2971	49.1957	1.2659	9.2593	41.2159	3.99126	59.2609	13.4147	-5.43215	18.8468
-15.318	-75.275	105.95	14.082	34.979	51.6052	1.093	50.3689	1.0668	9.25211	42.4237	3.67224	57.9824	12.8139	-5.46941	18.2833
-15.318	-75.275	91.44	14.126	34.981	48.5851	2.4296	47.4101	2.3708	9.23838	39.4172	3.54764	55.7078	11.289	-4.1937	15.4827
-15.3184	-75.2745	65.2	14.2444	34.9879	53.4152	2.049	52.1232	1.9994	9.2015	44.2839	3.33427	52.8695	10.4388	-3.77027	14.2091
-15.3184	-75.2745	41.1	14.6021	34.9976	57.3746	6.1558	55.9864	6.0069	9.09186	52.1763	3.2253	49.5276	9.59477	-3.14418	12.739
-15.3184	-75.2745	30.1	14.8339	35.0002	53.9986	0.9617	52.692	0.9384	9.02195	49.5857	3.99059	51.2092	11.6492	-3.66802	15.3172
-15.318	-75.275	15.71	15.072	35.007	51.0759	2.3565	49.8422	2.2996	8.95072	42.1935	3.53919	50.9142	9.70743	-2.62905	12.3365
-15.318	-75.275	11.73	15.111	35.008	47.0306	1.8251	45.8946	1.781	8.93913	38.1597	3.52257	51.1259	8.9082	-1.86306	10.7713
-15.318	-75.275	5.37	15.56	35.015	42.5969	0.4102	41.5668	0.4003	8.80741	33.8567	3.65057	51.1865	9.43072	-2.12959	11.5603
-15.318	-75.274	119.06	14.097	34.978	50.1979	2.8327	48.9853	2.7643	9.24751	41.021	3.35336	58.007	11.5358	-4.82909	16.3649
-15.318	-75.275	116.48	14.097	34.978	51.7876	2.2055	50.5379	2.1523	9.24751	42.6107	3.37659	57.693	11.7371	-4.98395	16.7211
-15.318	-75.275	110.72	14.11	34.979	56.2988	0.7101	54.9402	0.6929	9.24343	47.1259	2.73872	55.3051	11.3505	-5.87306	17.2236
-15.318	-75.275	107.24	14.115	34.98	55.9203	1.124	54.5736	1.0969	9.24184	46.749	3.41913	56.4941	10.8964	-4.05813	14.9545
-15.318	-75.275	100.78	14.16	34.982	58.4052	0.961	57	0.9379	9.22782	49.2478	3.24935	55.1811	10.3045	-3.80579	14.1103
-15.318	-75.275	95.42	14.18	34.984	55.9353	2.8855	54.5908	2.8161	9.22154	46.7841	3.2566	54.8642	9.85936	-3.34616	13.2055
-15.318	-75.275	90.05	14.206	34.985	55.1049	1.4251	53.7817	1.3909	9.21347	45.9618	3.23383	54.1338	9.41889	-2.95124	12.3701
-15.318	-75.275	80.11	14.337	34.991	60.048	1.6567	58.6074	1.617	9.17291	50.9451	3.65453	51.3906	11.4664	-4.15738	15.6238
-15.318	-75.275	75.34	14.326	34.991	61.507	2.091	60.033	2.0409	9.17629	52.4008	3.22164	51.07	9.4841	-3.04083	12.5249
-15.319	-75.275	70.47	14.333	34.992	61.432	1.1907	59.9613	1.1622	9.17409	52.3279	3.79476	51.4309	11.8935	-4.30396	16.1975
-15.319	-75.275	61.03	14.407	34.993	61.6405	1.7467	60.1616	1.7048	9.1514	52.559	4.11359	51.1427	13.4798	-5.25263	18.7324
-15.318	-75.275	58.84	14.403	34.994	59.5331	2.8977	58.1017	2.8281	9.15257	50.4504	3.23886	50.8921	9.3997	-2.92199	12.3217
-15.318	-75.275	55.27	14.441	34.994	57.892	3.4175	56.5001	3.3353	9.14098	48.8208	3.22074	51.1253	9.32917	-2.8877	12.2169
-15.318	-75.275	51.39	14.464	34.993	58.74	1.06	57.33	1.03	9.13402	49.6757	3.31882	51.4393	9.40128	-2.76365	12.1649
-15.318	-75.275	48.41	14.659	34.998	57.49	2.05	56.1	2	9.07464	48.4846	3.33651	51.0516	8.9942	-2.32119	11.3154
-15.318	-75.275	45.23	15.037	35.004	48.02	1.83	46.86	1.79	8.96123	39.1272	3.41378	50.9412	9.03217	-2.20462	11.2368
-15.318	-75.274	36.28	15.21	35.006	28.2188	2.2332	27.5429	2.1798	8.91002	19.3768	3.56504	51.2768	9.55975	-2.42967	11.9894
-15.318	-75.275	30.22	15.245	35.01	25.9698	1.248	25.3477	1.2181	8.89954	17.1382	3.61156	50.9759	9.09547	-1.87235	10.9678
-15.319	-75.275	25.25	15.174	35.007	28.2402	3.5974	27.561	3.5108	8.92058	19.3877	3.60698	51.0616	9.41777	-2.20382	11.6216
-15.319	-75.275	55.56	14.371	34.991	53.69	3.26	52.4	3.19	9.1625	44.5974	3.12963	51.7113	9.11599	-2.85673	11.9727
-15.318	-75.275	50.1	14.4	34.992	58.11	1.44	56.71	1.41	9.15359	49.0263	3.20564	51.0262	9.25403	-2.84274	12.0968
-15.318	-75.275	45.33	14.494	34.994	58.99	2.85	57.57	2.78	9.12484	49.9348	3.27543	51.0945	9.59438	-3.04351	12.6379
-15.318	-75.275	35.09	14.973	35	28.8633	2.8877	28.1692	2.8182	8.98044	19.9514	3.42055	50.7301	9.61751	-2.77641	12.3939
-15.318	-75.275	30.02	15.253	35.009	24.1564	3.5493	23.5747	3.4638	8.89724	15.3271	3.55742	51.0911	8.19756	-1.08273	9.28029
-15.318	-75.275	25.05	15.21	35.006	22.3614	1.1028	21.8224	1.0762	8.91002	13.5194	3.61645	51.1433	9.55525	-2.32234	11.8776
-15.318	-75.275	18.29	15.326	35.005	24.6835	2.1396	24.088	2.088	8.87602	15.8752	3.64197	51.036	9.8328	-2.54887	12.3817
