# Supplementary material for: Investigating the effect of El Niño on nitrous oxide distribution in the eastern tropical South Pacific
Source: Copernicus journal article supplement (doi:10.5194/bg-16-2079-2019), 2019-05-17
Supplement: Supplementary file 2 [file bg-2018-453-Supplement.docx]

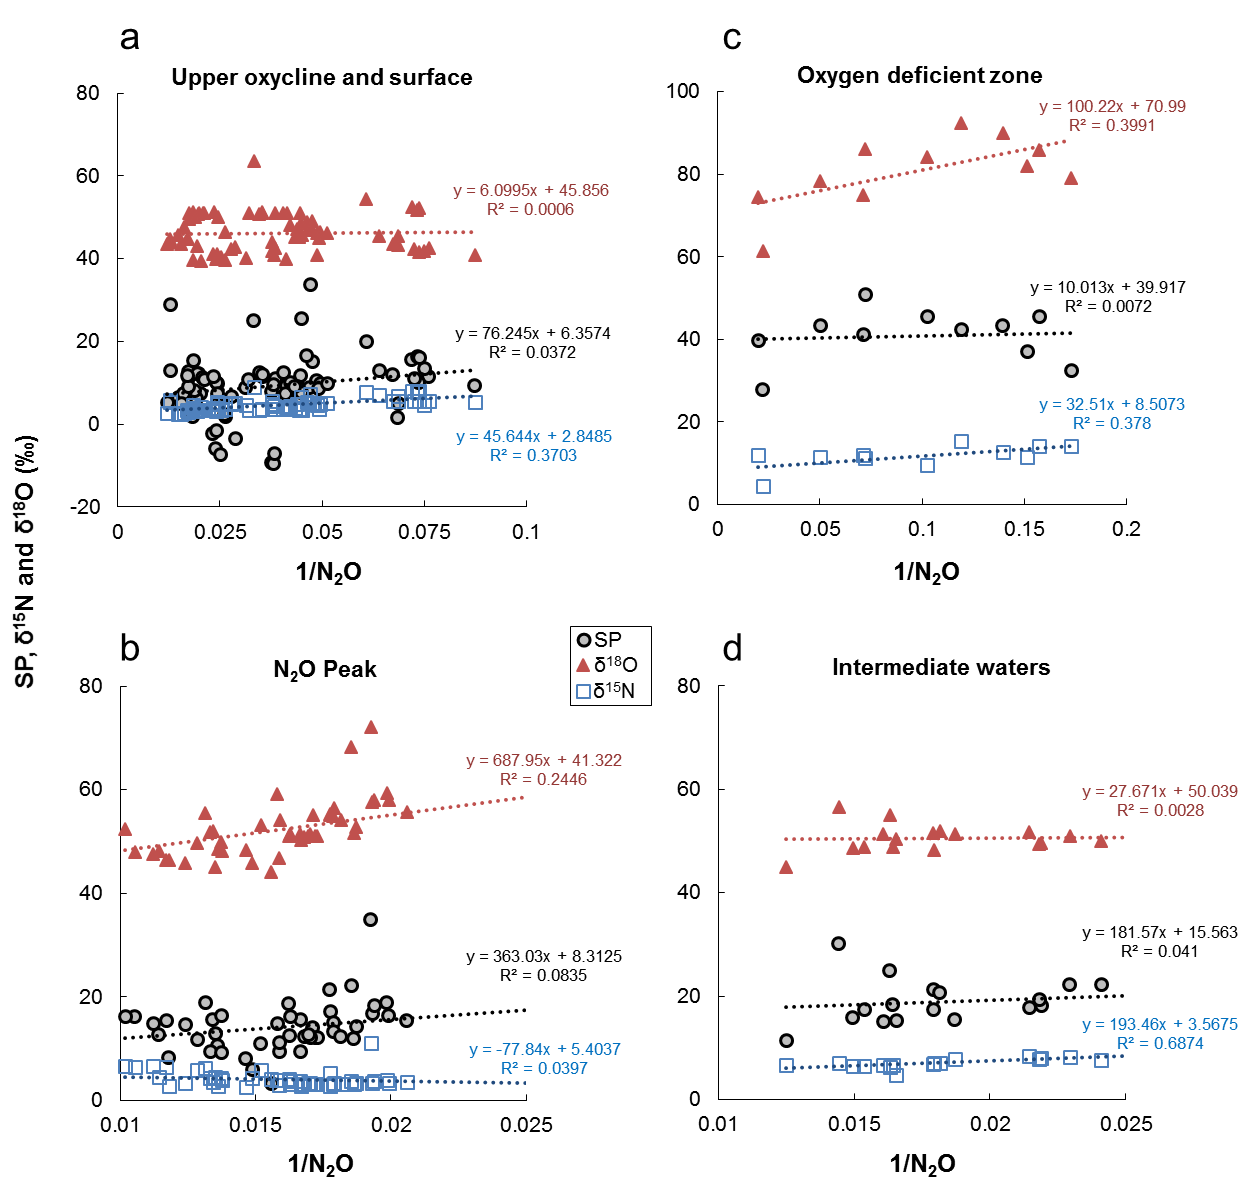


**Figure S1** Linear regression of N2O isotopes and site preference plotted against inverse N2O concentrations (nmol-1 L) at four different water bodies (see table 1 for descriptions of water bodies).


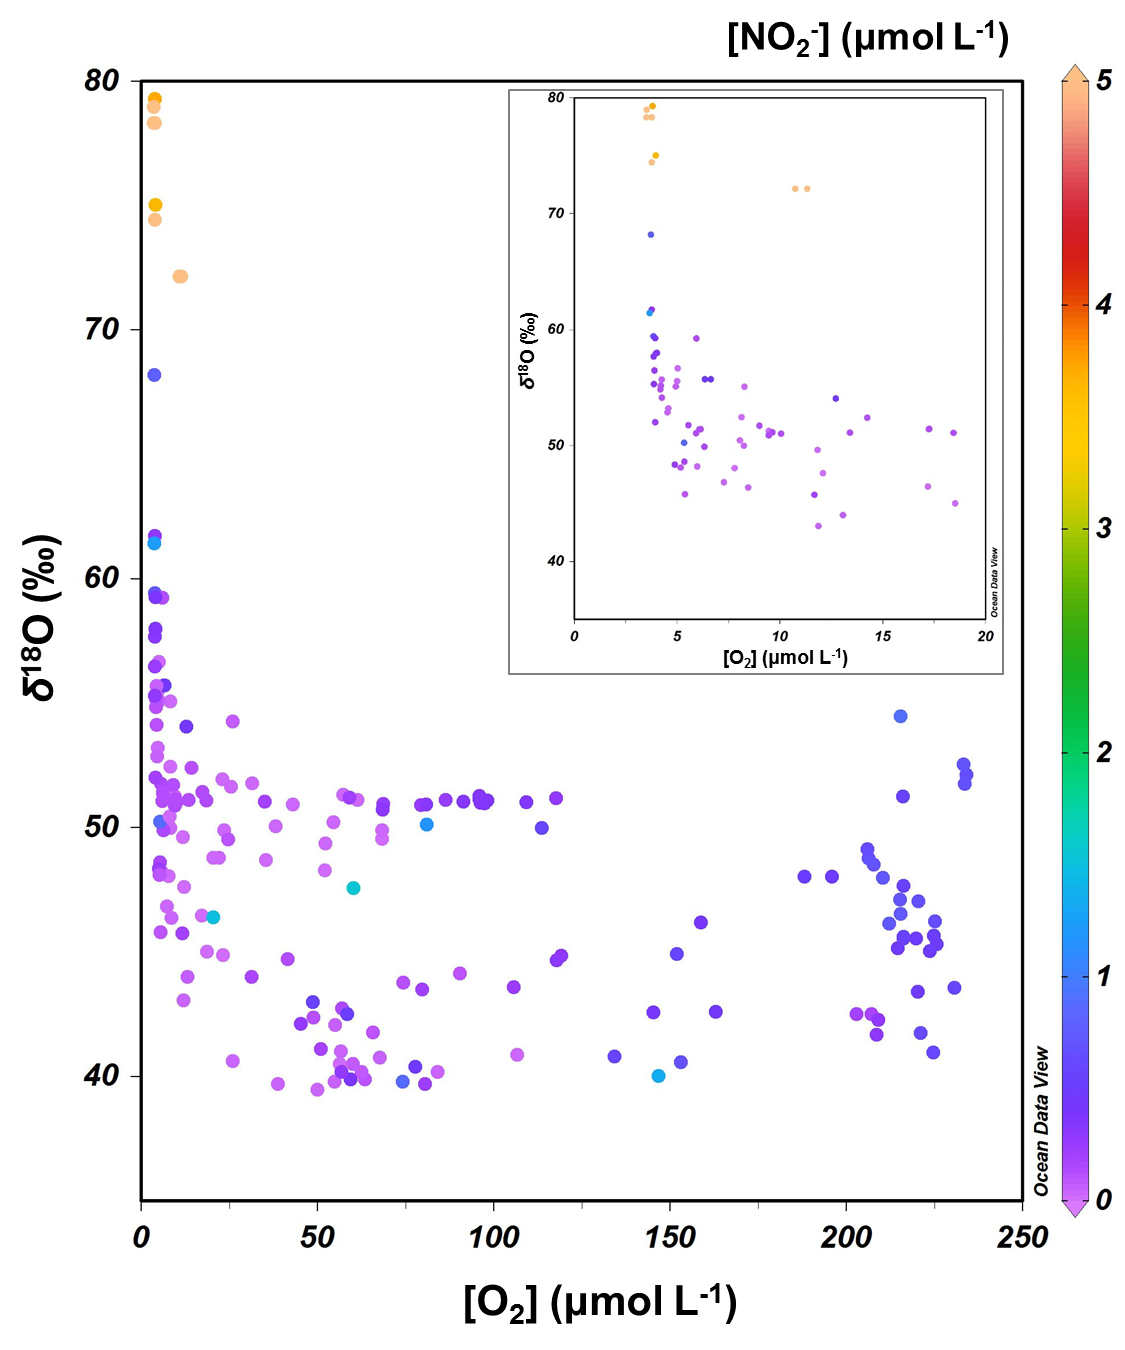


**Figure S2** Dissolved oxygen concentrations vs. *δ*18O-N2O and associated nitrite concentrations from samples collected in October 2015.

| Station  (depth range) | Year / Month | Latitude | Longitude | Reference |
| --- | --- | --- | --- | --- |
| A  (0 – 1000 m) | 2015 / 10 | 0 | 85.50°W | This study |
| 2012 / 11 | 0 | 85.83°W | Kock et al., 2016 |
| B  (0 – 800 m) | 2015 / 10 | 2.50°S | 85.50°W | This study |
| 2012 / 11 | 2.00°S | 85.83°W | Kock et al., 2016 |
| C  (0 – 800 m) | 2015 / 10 | 9.51°S | 80.31°W | This study |
| 2012 / 12 | 9.93°S | 80.25°W | Kock et al., 2016 |
| D  (0 – 70 m) | 2015 / 10 | 12.25°S | 77.08°W | This study |
| 2011 / 10 | 12.05°S | 77.29°W | Baustian et al., 2012 |
| E  (0 – 100 m) | 2015 / 01 | 13.50°S | 76.60°W | Ji, unpublished data |
| 2009 / 01 | 13.50°S | 76.46°W | Löscher et al., 2012 |
| F  (0 – 250 m) | 2015 / 01 | 16.30°S | 73.90°W | Ji, unpublished data |
| 1985 / 02 | 16.38°S | 74.67°W | Friederich et al., 1985 |

**Table S1** Data sources for water column N2O distributions between El Niño (shaded rows) and normal years. All the data can be downloaded from MEMENTO database (doi:10.1029/2015EO023665)

**Table S2** Isotopic and isotopomeric reference materials (in ‰) used in the N2O isotopic/isotopomeric measurements. Values for δ15Nbulk δ15Nα and δ15Nβ are relative to atmospheric N2 and δ18O to Vienna standard mean ocean water (VSMOW).

| **Standard name** | **Calibrated isotopic value** | | | | |
| --- | --- | --- | --- | --- | --- |
| *δ*15Nα | *δ*15Nβ | *δ*15Nbulk | Site preference | *δ*18O |
| CB09715 | -82.14 | -78.02 | -80.08 | -4.12 | 21.64 |
| CB09766 | 5.55 | -12.87 | -3.66 | 18.42 | 32.73 |
| CB08976 | 15.7 | -3.21 | 6.25 | 18.91 | 35.16 |
| 53504 | 1.71 | 94.44 | 48.08 | -92.73 | 36.01 |

**References**

**Baustian**, Tina, Graco, M., Bange, H. W., Flores, G., Ledesma, J., Sarmiento, M., Leon, V., Robles, C. and Moron, O. (2012). Nitrous Oxide Time Series Measurements off Peru – a collaboration between SFB 754 and IMARPE – Annual Report 2011. GEOMAR Report, N. Ser. 002. GEOMAR Helmholtz-Zentrum für Ozeanforschung, Kiel, Germany, 17 pp. doi: 10.3289/GEOMAR_REP_NS_2_2012.

**Friederich**, G. E., Kelly, P. J., Codispoti, L. A., Spinrad, R. W., Kullenberg, G., Elkins, J. W., Kogelschatz, J., Packard, T. T., Lipschultz, F., Glover, H. E., Ward, B. B., and Smith, A. E. (1985) Microbial nitrogen transformations in the oxygen minimum zone off Peru., Bigelow Laboratory for Ocean Sciences, East Boothbay, ME

**Kock**, A., Arévalo-Martínez, D. L., Löscher, C. R., and Bange, H. W. (2016). Extreme N2O accumulation in the coastal oxygen minimum zone off Peru, Biogeosciences, 13, 827-840, doi: 10.5194/bg-13-827-2016

**Löscher**, C. R., Kock, A., K_nneke, M., LaRoche, J., Bange, H. W., and Schmitz, R. A. (2012). Production of oceanic nitrous oxide by ammonia-oxidizing archaea, Biogeosciences, 9, 2419-2429, doi: 10.5194/bg-9-2419-2012
