# Supplementary material for: Investigating the effect of El Niño on nitrous oxide distribution in the eastern tropical South Pacific
Source: Copernicus journal article supplement (doi:10.5194/bg-16-2079-2019), 2019-05-17
Supplement: Supplementary file [file bg-16-2079-2019-supplement-title-page.pdf › bg-16-2079-2019-supplement-title-page.pdf]

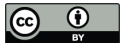

## *Supplement of*

# **Investigating the effect of El Niño on nitrous oxide distribution in the eastern tropical South Pacific**

**Qixing Ji et al.**

*Correspondence to:* Qixing Ji ([qji@geomar.de](mailto:qji@geomar.de))

- [bg-16-2079-2019-supplement-title-page.pdf](#)
- [DataSubmission\\_20190424-bg2018-453.xls](#)
- [bg-2018-453-Supplement.docx](#)

The copyright of individual parts of the supplement might differ from the CC BY 4.0 License.
